## Emergence of Zika virus: Direct reversion of mutations and fitness restoration prior to spread to the Americas

5 Jianying Liu<sup>1#</sup>, Yang Liu<sup>2#</sup>, Chao Shan<sup>2</sup>, Bruno T.D. Nunes<sup>3</sup>, Ruimei Yun<sup>1</sup>, Sherry L. Haller<sup>1</sup>,  
Grace H. Rafael<sup>1</sup>, Sasha R. Azar<sup>1</sup>, Clark R. Andersen<sup>4</sup>, Kenneth Plante<sup>1</sup>, Nikos Vasilakis<sup>5</sup>, Pei-  
Yong Shi<sup>2\*</sup>, Scott C. Weaver<sup>1\*</sup>

10 <sup>1</sup>World Reference Center for Emerging Viruses and Arboviruses, Institute for Human Infections  
and Immunity, and Department of Microbiology and Immunology, University of Texas Medical  
Branch, Galveston, Texas 77555 USA.

<sup>2</sup>Department of Biochemistry and Molecular Biology and Institute for Human Infections and  
Immunity, University of Texas Medical Branch, Galveston, Texas 77555 USA.

<sup>3</sup>Department of Arbovirology and Hemorrhagic Fevers, Evandro Chagas Institute, Ministry of  
Health, Ananindeua, Pará State, Brazil.

15 <sup>4</sup>Department of Preventive Medicine and Community Health, University of Texas Medical  
Branch, Galveston, Texas 77555, USA.

<sup>5</sup>Department of Pathology, Center for Biodefense and Emerging Infectious Diseases, World  
Reference Center for Emerging Viruses and Arboviruses, and Institute for Human Infections and  
Immunity, University of Texas Medical Branch, Galveston, Texas 77555, USA.

20

\*Corresponding authors. Emails: [sweaver@utmb.edu](mailto:sweaver@utmb.edu) and [peshi@utmb.edu](mailto:peshi@utmb.edu).

#These authors contributed equally.

25

## Summary Paragraph

Mosquito-borne viruses have recently spread globally, with major impacts on human health. Zika virus (ZIKV) emerged from obscurity in 2013 to spread from Asia to the South Pacific and the Americas, where millions of people were infected. For the first time, severe clinical manifestations, including Guillain Barré syndrome and defects to the fetuses of pregnant women, were detected. Phylogenetic studies have shown that ZIKV evolved in Africa and later spread to Asia, and that the Asian lineage is responsible for the recent epidemics. However, the reasons for the sudden emergence of ZIKV remain incompletely understood. Accumulating evidence on other arboviruses like chikungunya and West Nile suggest the likelihood that viral mutations could be determinants of change in ZIKV transmission efficiency responsible for efficient spread. Using evolutionary analyses, we determined that four mutations, which occurred just before ZIKV introduction to the Americas, represent direct reversions of previous mutations that accompanied spread many decades ago from ZIKV's native Africa to Asia and early circulation there. Experimental infections of mosquitoes, human cells, and mice using ZIKV strains with and without these mutations demonstrated that the original mutations reduced fitness for urban transmission, while the reversions restored fitness, increasing epidemic risk. Overall, our findings include the three newly identified, transmission-adaptive ZIKV mutations, and demonstration that these and one identified previously restored fitness for epidemic transmission soon before introduction into the America. The initial mutations may have followed founder effects and/or drift when the virus was introduced into Asia, or could be related to changes on host or vector utilization within Asia.

Zika virus (ZIKV), an arthropod-borne virus (arbovirus) in the genus *Flavivirus*, discovered in 1947<sup>1</sup>, remained obscure with little association with human disease until 2007. Then, small outbreaks occurred in Gabon<sup>2</sup> and Yap Island in Micronesia<sup>3</sup>, associated with mild dengue-like illness. In 2013, ZIKV spread to the South Pacific, where approximately half of the residents of French Polynesia were infected<sup>4</sup>, and an association with Guillain Barré syndrome (GBS) was discovered<sup>5</sup>. Spread to other areas of the South Pacific followed; then the first outbreak ever detected in the Americas was identified in 2015 northeastern Brazil<sup>6</sup>, accompanied by a dramatic increase in the incidence of microcephaly<sup>7</sup> and other congenital malformations now termed congenital Zika syndrome (CZS)<sup>8</sup>. ZIKV continued to spread to nearly all countries in the Americas with the continued association with GBS and CZS, leading the World Health Organization to declare in 2016 a Public Health Emergency of International Concern.

Early phylogenetic studies combined with ZIKV detections and seroprevalence indicated that the virus originated in and remains widespread in Africa, and was introduced many decades ago to Asia<sup>9</sup>. However, the reason(s) for its recent, dramatic spread to the Americas remain enigmatic. One hypothesis is that ZIKV increased its ability to be transmitted efficiently by mosquito vectors through adaptive mutations. This mechanism has been demonstrated for other arboviruses including West Nile<sup>10</sup>, Venezuelan equine encephalitis<sup>11</sup> and chikungunya (CHIKV) viruses<sup>12</sup>. RNA arboviruses exhibit high mutational frequencies due to their lack of proof-reading during genome replication, providing the opportunity for rapid adaptation to changing infection and transmission opportunities<sup>13</sup>. The first evidence supporting this adaptive evolution hypothesis for ZIKV came from studies of an A188V amino acid substitution in the nonstructural protein 1 (NS1-A188V) that occurred just before ZIKV spread to the South Pacific and the Americas. This substitution slightly enhances ZIKV transmission by *Aedes (Stegomyia) aegypti* mosquitoes<sup>14</sup>, the principal epidemic vector<sup>15</sup>. Another substitution, V473M in the envelope protein, increases viremia in nonhuman primates, also suggesting enhanced fitness for transmission<sup>16</sup>. Capsid substitution T106A and several others were previously studied for their

effects on mouse virulence, but none was identified. Polyprotein substitution S139N (=prM S17N) was shown to enhance murine infectivity in human and mouse neural progenitor cells and to cause more severe microcephaly in mice<sup>17</sup>, phenotypes not associated with more efficient transmission via viremia.

80 **Directly reverting Zika virus mutations.** To further test the hypothesis that adaptive evolution enhanced epidemic ZIKV transmission, leading to unprecedented spread, millions of infections, and the resulting detection of rare disease manifestations, we performed phylogenetic analyses to identify additional amino acid substitutions that preceded its spread from Asia to the Americas. Extended Data Fig. 1 shows a tree with four substitutions mapped to branches that preceded epidemic spread, including NS1-A188V<sup>14</sup>. Tracings of these amino acids in ZIKV phylogenetic trees are shown in Extended Data Fig. 2. Strikingly, when we traced the evolution of these 4 pre-epidemic amino acid substitutions, we found that they all represented direct reversions of earlier mutations inferred to have accompanied spread from Africa to Asia, or early circulation in Asia. None of these initial mutations was noted in earlier, comprehensive phylogenetic studies<sup>18</sup>. The simplest explanation for this mutation pattern is that the pre-epidemic substitutions restored fitness (reproduction and survival ability) declines caused by founder effects and/or genetic drift during early, inefficient *A. aegypti*-borne interhuman transmission. This transmission inefficiency is consistent with the lack of recognized outbreaks in Asia before 2010, and bottlenecks that accompany the arbovirus transmission cycle can allow drift to dominate evolution if populations remain small.

90  
95  
100  
105  
106  
107  
108  
109  
110  
111  
112  
113  
114  
115  
116  
117  
118  
119  
120  
121  
122  
123  
124  
125  
126  
127  
128  
129  
130  
131  
132  
133  
134  
135  
136  
137  
138  
139  
140  
141  
142  
143  
144  
145  
146  
147  
148  
149  
150  
151  
152  
153  
154  
155  
156  
157  
158  
159  
160  
161  
162  
163  
164  
165  
166  
167  
168  
169  
170  
171  
172  
173  
174  
175  
176  
177  
178  
179  
180  
181  
182  
183  
184  
185  
186  
187  
188  
189  
190  
191  
192  
193  
194  
195  
196  
197  
198  
199  
200  
201  
202  
203  
204  
205  
206  
207  
208  
209  
210  
211  
212  
213  
214  
215  
216  
217  
218  
219  
220  
221  
222  
223  
224  
225  
226  
227  
228  
229  
230  
231  
232  
233  
234  
235  
236  
237  
238  
239  
240  
241  
242  
243  
244  
245  
246  
247  
248  
249  
250  
251  
252  
253  
254  
255  
256  
257  
258  
259  
260  
261  
262  
263  
264  
265  
266  
267  
268  
269  
270  
271  
272  
273  
274  
275  
276  
277  
278  
279  
280  
281  
282  
283  
284  
285  
286  
287  
288  
289  
290  
291  
292  
293  
294  
295  
296  
297  
298  
299  
300  
301  
302  
303  
304  
305  
306  
307  
308  
309  
310  
311  
312  
313  
314  
315  
316  
317  
318  
319  
320  
321  
322  
323  
324  
325  
326  
327  
328  
329  
330  
331  
332  
333  
334  
335  
336  
337  
338  
339  
340  
341  
342  
343  
344  
345  
346  
347  
348  
349  
350  
351  
352  
353  
354  
355  
356  
357  
358  
359  
360  
361  
362  
363  
364  
365  
366  
367  
368  
369  
370  
371  
372  
373  
374  
375  
376  
377  
378  
379  
380  
381  
382  
383  
384  
385  
386  
387  
388  
389  
390  
391  
392  
393  
394  
395  
396  
397  
398  
399  
400  
401  
402  
403  
404  
405  
406  
407  
408  
409  
410  
411  
412  
413  
414  
415  
416  
417  
418  
419  
420  
421  
422  
423  
424  
425  
426  
427  
428  
429  
430  
431  
432  
433  
434  
435  
436  
437  
438  
439  
440  
441  
442  
443  
444  
445  
446  
447  
448  
449  
450  
451  
452  
453  
454  
455  
456  
457  
458  
459  
460  
461  
462  
463  
464  
465  
466  
467  
468  
469  
470  
471  
472  
473  
474  
475  
476  
477  
478  
479  
480  
481  
482  
483  
484  
485  
486  
487  
488  
489  
490  
491  
492  
493  
494  
495  
496  
497  
498  
499  
500  
501  
502  
503  
504  
505  
506  
507  
508  
509  
510  
511  
512  
513  
514  
515  
516  
517  
518  
519  
520  
521  
522  
523  
524  
525  
526  
527  
528  
529  
530  
531  
532  
533  
534  
535  
536  
537  
538  
539  
540  
541  
542  
543  
544  
545  
546  
547  
548  
549  
550  
551  
552  
553  
554  
555  
556  
557  
558  
559  
560  
561  
562  
563  
564  
565  
566  
567  
568  
569  
570  
571  
572  
573  
574  
575  
576  
577  
578  
579  
580  
581  
582  
583  
584  
585  
586  
587  
588  
589  
590  
591  
592  
593  
594  
595  
596  
597  
598  
599  
600  
601  
602  
603  
604  
605  
606  
607  
608  
609  
610  
611  
612  
613  
614  
615  
616  
617  
618  
619  
620  
621  
622  
623  
624  
625  
626  
627  
628  
629  
630  
631  
632  
633  
634  
635  
636  
637  
638  
639  
640  
641  
642  
643  
644  
645  
646  
647  
648  
649  
650  
651  
652  
653  
654  
655  
656  
657  
658  
659  
660  
661  
662  
663  
664  
665  
666  
667  
668  
669  
670  
671  
672  
673  
674  
675  
676  
677  
678  
679  
680  
681  
682  
683  
684  
685  
686  
687  
688  
689  
690  
691  
692  
693  
694  
695  
696  
697  
698  
699  
700  
701  
702  
703  
704  
705  
706  
707  
708  
709  
710  
711  
712  
713  
714  
715  
716  
717  
718  
719  
720  
721  
722  
723  
724  
725  
726  
727  
728  
729  
730  
731  
732  
733  
734  
735  
736  
737  
738  
739  
740  
741  
742  
743  
744  
745  
746  
747  
748  
749  
750  
751  
752  
753  
754  
755  
756  
757  
758  
759  
760  
761  
762  
763  
764  
765  
766  
767  
768  
769  
770  
771  
772  
773  
774  
775  
776  
777  
778  
779  
780  
781  
782  
783  
784  
785  
786  
787  
788  
789  
790  
791  
792  
793  
794  
795  
796  
797  
798  
799  
800  
801  
802  
803  
804  
805  
806  
807  
808  
809  
810  
811  
812  
813  
814  
815  
816  
817  
818  
819  
820  
821  
822  
823  
824  
825  
826  
827  
828  
829  
830  
831  
832  
833  
834  
835  
836  
837  
838  
839  
840  
841  
842  
843  
844  
845  
846  
847  
848  
849  
850  
851  
852  
853  
854  
855  
856  
857  
858  
859  
860  
861  
862  
863  
864  
865  
866  
867  
868  
869  
870  
871  
872  
873  
874  
875  
876  
877  
878  
879  
880  
881  
882  
883  
884  
885  
886  
887  
888  
889  
890  
891  
892  
893  
894  
895  
896  
897  
898  
899  
900  
901  
902  
903  
904  
905  
906  
907  
908  
909  
910  
911  
912  
913  
914  
915  
916  
917  
918  
919  
920  
921  
922  
923  
924  
925  
926  
927  
928  
929  
930  
931  
932  
933  
934  
935  
936  
937  
938  
939  
940  
941  
942  
943  
944  
945  
946  
947  
948  
949  
950  
951  
952  
953  
954  
955  
956  
957  
958  
959  
960  
961  
962  
963  
964  
965  
966  
967  
968  
969  
970  
971  
972  
973  
974  
975  
976  
977  
978  
979  
980  
981  
982  
983  
984  
985  
986  
987  
988  
989  
990  
991  
992  
993  
994  
995  
996  
997  
998  
999  
1000

Founder effects result in a loss in genetic diversity that accompanies geographic introductions of small founder populations from a large, ancestral population. For human-amplified arboviruses like ZIKV, these typically involve a single infected traveler<sup>19</sup>. Furthermore, several virus population bottlenecks are known to punctuate the arbovirus transmission cycle during mosquito infection and dissemination of virus to the salivary glands. The resultant loss of genetic diversity can result in the fixation of random mutations, the majority of which are, by chance, deleterious for RNA viruses<sup>20</sup> and other organisms. The hypothesis that African ZIKV strains lost fitness upon their introduction into Asia is also supported by their greater infectivity for *A. aegypti* mosquitoes compared to Asian and subsequent American ZIKV strains<sup>21-23</sup>, as well as their greater virulence in mouse models of human infection<sup>23,24</sup>.

As an initial test of the hypothesis that ZIKV underwent a fitness decline upon its introduction into Africa, followed by fitness restoration, we assessed the fitness of African, Asian, and American ZIKV strains. We used competition fitness assays, where ZIKV strains differing by as little as one amino acid were generated from cDNA clones and mixed in a roughly 1:1 ratio based on Vero cell plaque-forming units (PFU). This inoculum mixture was then used to initiate infections. Following appropriate incubation to allow the two strains to compete for replication and, in mosquitoes, dissemination to the salivary glands, the virus mixture was again quantified by Sanger sequencing of RT-PCR amplicons to estimate the ratios of mixed nucleotides using electropherogram peaks. The relative fitness value  $w$  was analyzed according to  $w=(f_0/i_0)$ , where  $f_0$  is the final ratio of one competitor following infection, and  $i_0$  is the initial ratio in the inoculum or bloodmeal mixture; this ratio reflects relative fitness advantage of one competitor over the other (Fig. 1a). This approach has major advantages over performing individual strain infections with numerous host replicates; each competition is internally controlled, eliminating host-to-host variation that can reduce the power of experiments, and the virus strain ratios can be assayed with more precision than individual virus titers. Thus, competition assays have been used for many studies of microbial fitness<sup>25</sup>, including arboviruses<sup>26-28</sup>. Because the competition assay relies on electropherogram peak measurements from Sanger sequencing to quantify mutant ratios, with the potential for inconsistency, we conducted experiments to validate the consistency and accuracy of this method. Extended Data Fig. 3 shows the very high degree of accuracy and consistency of this method. To confirm that our targeted 1:1 ratios were similar in mosquito experimental systems, where RNA:infectious virus ratios could differ based on

different host-dependent levels of mutant infectivity, compared to those for Vero cells, we also determined infectious titers of the wt and mutants on C6/36 mosquito cells, and compared them with the Vero PFU ratios. These ratios were nearly indistinguishable with no significant differences (Extended data Fig. 4), indicating that frequency-based differences in fitness based on potential mutation effects on initial infectivity were not a concern.

**Fitness of major Zika virus lineages.** Initially, we performed competition assays with wild-type (*wt*) ZIKV strains representing the African, Asian pre-epidemic, and American epidemic genotypes (Fig. 1). The highly susceptible Rockefeller strain of *A. aegypti* mosquitoes was used along with interferon type I receptor-deficient A129 mice, models for human infection<sup>29,30</sup>. Following infection with an approximately 1:1 mixture of the African Dakar 41525 and Asian Cambodian FSS13025 strains, or an equivalent mixture of FSS130025 and the Puerto Rican RRVABC59 strain, samples from mosquito bodies and mice were evaluated for changes in the initial ratio, indications of competitive fitness (Fig. 1a). Following oral mosquito infection and incubation, the African strain consistently and significantly won the competition with the Asian strain, and the Puerto Rican strain consistently outcompeted the Asian strain (Fig. 1b). These findings were reproducible when additional African, Asian and American ZIKV strains, as well as a Dominican Republic strain of *A. aegypti* with a low level of colonization (F6), were used (Extended Data Fig. 5). After three days of competition following subcutaneous infection of A129 mice to mimic human infection, the same relative fitness results were obtained when viremic blood (the vertebrate host compartment where major selection for efficient mosquito infection occurs) was analyzed (Fig. 1c). Analysis of individual organ samples from mice on day 8 (after viremia had subsided to eliminate this confounding source of virus in organs) showed that these competition outcomes were consistent for replication throughout the mouse (Extended Data Fig. 6). Mosquitoes that fed upon these viremic mice were also evaluated after extrinsic incubation, with the same results of greater fitness of the African versus Asian ZIKV strain, and greater fitness of the American versus Asian strain (Fig. 1d).

Next, primary human cells believed to be involved in seeding viremia were used for competition assays: fibroblasts and keratinocytes<sup>31,32</sup>. The mixed ZIKVs were inoculated into cells and the culture supernatant were harvested, RT-PCR-amplified and Sanger sequenced 3 days post-infection (Extended Data Fig. 7a). The results showed that the African strain and post-epidemic American strains always out-competed the pre-epidemic Asian strain in both cell types (Extended Data Fig. 7b, c). In all of these experimental models, the changes in competitor ratios appeared to be greater between the African versus Asian strains compared to the Asian versus American strains. Overall, these data supported the hypothesis that ZIKV underwent a major loss of fitness upon its introduction into Asia, followed by a partial restoration of fitness upon introduction into the Americas. We note that microcephaly and other central nervous system involvement is rare and not known to play a major role in generating viremia, so there should not be major selection for CNS tropism to enhance viremia and subsequent transmission by mosquitoes. Therefore, microcephaly may represent a chance pathogenic outcome that did not result from positive selection. Also, sexual ZIKV transmission is believed to play a minor role compared to vector-borne transmission.

Based on the evidence discussed above, we developed a revised adaptation hypothesis, depicted in Fig. 2a, that the 4 initial amino acid substitutions (and possibly others not undergoing reversion) represent founder effects that reduced the fitness of ZIKV for transmission in the epidemic cycle by reducing *A. aegypti* transmissibility and/or human viremia levels. The reversion of these 4 mutations, and possibly other adaptive mutations, then partially restored ZIKV fitness, allowing for efficient spread to the Americas and major epidemics.

**Fitness effect of reversion mutations.** To test this hypothesis that the 4 revertant mutations restored ZIKV fitness, we used *A. aegypti* mosquitoes and A129 mice in more detailed studies of the combinations of four amino acid substitutions that underwent reversion. For mosquito infections, we assayed bodies to evaluate infection and initial replication, legs to

180 sample the hemolymph, which contains virus that has disseminated from the digestive tract (midgut) into the hemocoel for access to the salivary glands, and saliva collected in vitro to assess the virus population available for transmission (Fig. 2b). Competition between the African ZIKV strain and a mutant containing the four initial amino acid substitutions resulted in a consistent advantage for the African strain in all mosquito samples (Fig. 2c), as did infection of A129 mice as sampled in major organs and blood (Fig. 2d, Extended Data Fig. 8a). In contrast, when the four reversion substitutions were placed into the pre-epidemic Asian strain to recapitulate ZIKV evolution just before introduction into the Americas, these substitutions resulted in a major fitness gain (Fig. 2e, f, Extended Data Fig. 8b). When mosquitoes were fed upon the viremic mice, the same outcome was observed (Fig. 2g, h). These results indicate that the four substitutions that directly reverted prior to the introduction of ZIKV into the Americas were major components of the fitness differences among African, Asian and American virus strains. At the same time, similar competition assays were performed in human fibroblasts and keratinocytes. The ZIKV strains containing these four initially substituted amino acids always won the competition in these human primary cells (Extended Data Fig. 9).

185 To assess the roles of the individual amino acid substitutions in the overall fitness differences among ZIKV strains, we tested them individually using the same experimental systems. Placed individually into the African strain, all four initial mutations reduced overall fitness for infection, dissemination (two mutants showed no fitness effect in this compartment) and transmission by mosquitoes, although only C-A106T and NS1-V188A results were significant (Fig. 3a-c). The same trends were observed in mosquito bodies, legs and saliva (Fig. 3a-c). When the reversions were placed into the Asian strain, only the NS1-A188V mutant produced a significant increase in ZIKV infection in the mosquito bodies, legs and saliva, indicating this amino acid may have a dominant role during the competition (Fig. 3d-f). As with the 4X mutants, the lack of detection of one competitor in saliva samples indicates a major fitness advantage for vector transmission. To confirm fitness effects in models for the vertebrate amplification host, the Dakar NS1-V188A and FSS NS1-A188V mutants were mixed with corresponding *wt* strains and inoculated into A129 mice. The ZIKVs containing NS1-226V exhibited a fitness advantage in both mice (Fig. 3g, h, Extended Data Fig. 10) and mosquitoes (Fig. 3i, j). The slight asymmetry in the fitness effects between some of the initial 4 mutations in the African strain and the reversions in the Cambodian pre-epidemic strain could reflect epistatic interactions that differ between the two virus strains.

200 Finally, the overall fitness of the sets of four mutations or reversions were tested over a complete experimental transmission cycle. To initiate the cycle, mosquitoes were inoculated intrathoracically (to ensure uniform infection) with mixtures of the African ZIKV strain and the four initial mutations, or the Asian strain with the four reversions (Fig. 4a). Following six days of extrinsic incubation (mosquitoes become infectious more rapidly after intrathoracic than oral infection), these mosquitoes were exposed to A129 mice for oral transmission. Three days later during peak viremia, naïve mosquitoes were allowed to feed on the mice, then these mosquitoes were assayed after 14 days of extrinsic incubation as in the above experiments. In salivary glands following incubation after mosquito inoculation, the initial four mutations decreased the fitness of the African ZIKV strain (Fig. 4b), and the four reversions increased the fitness of the Asian strain (Fig. 4c) as observed after oral infection (Fig. 2c, e). These fitness effects continued during infection of mouse blood and organs (Fig. 4d, e, Extended Data Fig. 11) and also in mosquitoes fed orally on these mice during viremia (Fig 4f, g). Overall, these results demonstrate that the four initial mutations reduced the fitness of the African ZIKV strain through a complete transmission cycle, while the four reversions at least partially restored fitness.

225 **Evolution of ZIKV fitness in Asia.** In summary, we identified three ZIKV amino acids (C-106, prM-1 and NS5-872) that we show for the first time affect virus transmission by increasing infection and transmission efficiency by *A. aegypti* and/or enhancing replication in models for

230 human infection. We also demonstrate for the first time that, like those three residues, the NS1-  
A188V, shown earlier to enhance vector infection<sup>14</sup>, also represents a direct reversion of a  
mutation that occurred soon after ZIKV reached Asia. Although all South Pacific and American  
ZIKV strains include all four reversions, some recent Asian strains also have some of these  
revertant residues. This suggests that the reversions did not all occur immediately before ZIKV  
235 introduction to these epidemic locations, which is consistent with emergence involving a  
combination of adaptive mutations that predispose virus strains to epidemic initiation, along with  
stochastic factors related to chance introductions into naïve, epidemic-permissive locations.  
Also, the lower fitness of the 4X reversion mutant compared to the American strains (Fig. 2)  
indicates that other mutations that do not represent reversions were likely also involved in  
emergence. These conserved amino acid substitutions in distal tree branches and their possible  
240 phenotypes are listed in Extended Data Table 1.

Overall, our results support the hypothesis that ZIKV underwent fitness declines upon its  
introduction into Asia many decades ago, and/or during its initial stages of circulation there  
when a lack of recognized outbreaks suggests limited urban circulation. An alternative  
hypothesis that would not rely on drift is that ZIKV host range changed upon its introduction into  
245 Asia, followed by another change (or reversion in host usage) just before introduction into the  
Americas; both of these hypothetical host range changes could have resulted in positive  
selection that involved the same four amino acids, resulting in reversion. The simplest form of  
this hypothesis would be that a sylvatic cycle involving different vectors and vertebrate hosts  
from those in Africa was the initial form of Asian transmission, and the urban cycle only  
250 developed there relatively recently accompanied by the four reversions. Although there is no  
evidence of enzootic ZIKV transmission in Asia, and the 1966 ZIKV isolation from *A. aegypti*  
mosquitoes in Malaysia suggests that human-amplified transmission has been ongoing in Asia  
for many decades, the detection of a sylvatic cycle is difficult in the absence of extensive  
genetic divergence from urban strains.

255 **Parallels with CHIKV.** The hypothesis that the initial urban ZIKV cycle was inefficient due to  
founder effects and drift, is consistent with the same pattern of fitness loss that accompanied  
CHIKV introduction into Asia about a century ago, when a major deletion in the 3' untranslated  
genome region occurred. This fitness of this Asian lineage remains incompletely restored to this  
day<sup>31</sup>. However, the inability of the four ZIKV reversion mutations to generate fitness  
260 comparable to that of African strains suggests that additional mutations, possibly also the result  
of founder effects or drift but without direct reversions, also limited transmission and spread in  
Asia. Additional mutations that occurred during circulation in Asia must be tested to expand our  
results to a comprehensive understanding of ZIKV evolution, and understanding the  
mechanisms of fitness effects of the four substitutions we studied require further study.

265 These results as well as the evolutionary history of ZIKV have remarkable parallels to those  
of CHIKV, which also evolved in Africa and spread many decades ago to Asia before its recent  
introduction into the Americas<sup>12</sup>. Previous studies indicate that the CHIKV arrived in Asia many  
decades ago with debilitating mutations in its 3' untranslated genome region (3'UTR), followed  
by only partially fitness restoration over many decades through point mutations and a  
270 duplication<sup>33</sup>. Another mutation in the E1 glycoprotein, also a probable founder effect (no  
phenotype has been established for this mutation on its own), prevented for many decades  
CHIKV adaptation for efficient transmission by *A. albopictus* mosquitoes in Asia, their native  
territory<sup>34</sup>. Then, just before or upon its introduction into the Americas in 2013, a duplication in  
the 3'UTR also improved CHIKV fitness<sup>35</sup>. However, unlike ZIKV, another lineage of CHIKV has  
275 also undergone a series of adaptive mutations to enhance its ability to use *A. albopictus* for  
transmission, with no evidence of founder effects, and the relative fitness advantages of these  
CHIKV mutations far exceed those of the four ZIKV mutations that we studied; for example,  
individual *A. albopictus*-adaptive CHIKV mutations showed relative fitness values of 5-40, while  
even the combination of 4 ZIKV mutations we studied had a lower overall fitness effect than any

280 of these individual CHIKV mutations (Extended Data Table 2). The similarities in the presumed  
roles of founder effects in the evolution and emergence potential of ZIKV and CHIKV suggest  
that drift has been understudied as a factor in the emergence of arboviral and other RNA viral  
diseases, and that the stochastic nature of founder effects may limit our ability to ultimately  
predict the emergence of new viral diseases.

285 Finally, the high fitness of the African ZIKV strains in all experimental systems we utilized  
raises important questions about the risk of outbreaks and severe disease on that continent.  
The greater transmissibility of these African strains, even compared to American strains<sup>21</sup>,  
raises the question of why outbreaks have never been detected in Africa aside from one in  
Angola caused by a strain imported from the Americas<sup>36</sup>. Limited African surveillance and the  
290 widespread presence of other infections that typically lead to Zika misdiagnosis in the absence  
of laboratory diagnostics could be responsible. Herd immunity in Africa, which could also play a  
role in limiting outbreaks as well as the incidence of congenital Zika syndrome, has been  
reported to range from 1-52%<sup>37</sup>. However, some studies have used methods other than  
neutralization that could be highly cross-reactive with other endemic flaviviruses. We also  
295 cannot rule out the possibility that our models for human infection are not suitable to determine  
ZIKV fitness for human amplification. Additional surveillance and work with more human cells  
and possibly nonhuman primate models are needed to further explore this possibility and to  
better understand the lack of Zika outbreaks in Africa caused by African lineage strains.

300 In addition to the fitness for transmission that we examined, the history of ZIKV's ability to  
cause GBS and CZS requires further study. It is possible that enhanced viremia just before  
spread to the Americas, suggested by our model systems involving human cells and A129 mice,  
could at least partially explain the emergence of these severe disease outcomes if viremia  
magnitude is correlated with infection of the placenta. However, better surveillance in Africa is  
ultimately needed to determine if American or recent Asian strains are unique in this pathogenic  
305 potential.

## Methods.

310 Mouse and mosquito studies were performed in accordance with the guidance for the Care and Use of Laboratory Animals of the University of Texas Medical Branch (UTMB). The protocol (protocol number 1708051 for mouse) were approved by the Institutional Animal Care and Use Committee (IACUC) at UTMB. All the mouse manipulations were performed under anesthesia by isoflurane.

### Mice, mosquitoes, cells and viruses

315 A129 mice, which are deficient in type I interferon receptors, were bred and maintained in animal biosafety level 2 (ABSL2) facilities at UTMB. Sex-matched mice, randomly selected and 6-to-8-week-old, were used. The *Aedes aegypti* Rockefeller strain and *A. aegypti* Dominican Republic strain (F6) were maintained in an incubator at 28°C and 80% humidity. Vero cells (CCL81) and C6/36 cells for virus rescue, proliferation and titration were purchased from the American Type Culture Collection (Bethesda, MD, USA) and maintained in Dulbecco's modified Eagle's medium (Gibco, Waltham, MA, USA) with 10% heat-inactivated fetal bovine serum (Atlanta Biologicals, Flowery Branch, GA, USA), and supplemented with 1% Tryptose phosphate broth (Gibco, Waltham, MA, USA) for C6/36 cells. The human primary dermal fibroblast cells and human epidermal keratinocyte cells were purchased from Lonza (Walkersville, MD, USA) and were maintained in FGM-2 BulletKit (Lonza) and KGM-Gold BulletKit (Lonza) media, respectively. All cells were verified and tested negative for mycoplasma. The parental African lineage ZIKV Dakar 41662 strain (KU955592), and 41671 stain (KU955595), and Asian lineage ZIKV Dominican Republic R114916 (KX766028), and Honduras HN-ME 59 stains were obtained from the World Reference Center for Emerging Viruses and Arboviruses at UTMB. The ZIKV DK-WT (Dakar wild-type 41525 strain, 320 KU955591), DK-A106T (capsid 106th amino-acid), DK-A1V (pre-membrane 1st amino-acid), DK-V188A (nonstructural protein 1 188th amino-acid), DK-V872M (nonstructural protein 5 872nd amino-acid) were constructed using standard site-directed mutagenesis of cDNA clones and rescued on Vero cells using electroporation of transcribed RNA. The FSS-WT (FSS13025 wild-type strain, KU955593), FSS-T106A, FSS-V1A, FSS-A188V and FSS-M872V, as well as 330 335 reversion mutants placed in the ZIKV Dakar strain, were constructed in the same manner, along with the DK-4M and FSS-4M that combined all four mutations on the matched backbone.

### Competition assay

340 To better understand the relative fitness of different ZIKV strains and mutants, we conducted competition assays between two virus strains or a wild-type and mutant strain in various models. Initial 1:1 virus:mutant mixtures were made based on PFU titers determined in Vero cells, and virus ratios used to calculate fitness were determined by Sanger sequencing of RT-PCR amplicons. The PFU:genome ratio was consistent among all of our ZIKV strains and constructs, as estimated from the inocula and bloodmeals by comparing Vero cell PFU to 345 genome copies as estimated from real-time RT-qPCR standard curves. To confirm that ratios were also similar in mosquito experimental systems, where RNA:infectious virus ratios could differ based on different levels of infectivity compared to Vero cells, we also determined infectious titers of the wt and mutants on C6/36 mosquito cells, and compared them with the Vero-PFU ratios.

350

**Mosquitoes.** The *Aedes aegypti* Rockefeller strain and *A. aegypti* Dominican Republic strain (F6) were used for the following studies. Triplicate mixtures of viruses were diluted to 6 log<sub>10</sub> PFU/ml mixed at a 1:1 ratio based on Vero PFU titers. Virus mixtures were subsequently mixed at a ratio of 1:1 with PBS-washed sheep blood cells (Hemostat laboratories, Galveston, TX,



355 USA). Aliquots of blood meals were collected to verify the initial virus proportions in the  
inoculum. Following a 14-day extrinsic incubation, saliva expectorated into capillary tubes, legs  
representing virus disseminated into the hemocoel, or remaining mosquito bodies were  
collected separately in a 2ml Eppendorf Safe Lock tube with 250 $\mu$ l DMEM (2% FBS, 1% Sodium  
Pyruvate) with 25 mg/ml Amphotericin B and a stainless steel bead (Qiagen, Hilden, Germany).  
360 Samples were stored at -80°C.

**A129 mice.** Sex-matched A129 mice (6-8 weeks old) were used for ZIKV competition assays.  
The A129 mouse is defective for the interferon type I receptor and susceptible to ZIKV infection  
in vivo with high titered viremia. Mixtures of ZIKV strains (total  $1 \times 10^4$  PFU/mouse) were  
365 inoculated intradermally to simulate a mosquito bite. Titers of viruses before mixing were plaque  
assayed to verify proper concentrations. Also, an aliquot of the inoculum was reserved for  
estimating the initial ratio of viruses. Mice were bled retro-orbitally on day 3 post infection  
representing the peak. Serum was collected from blood via centrifugation at 2,000 g for 5  
minutes and stored at -80°C until analysis. Eight days post infection, all infected mice were  
370 euthanized and necropsied and major organs collected in a 2ml Eppendorf Safe Lock tube with  
500 $\mu$ l DMEM (2% FBS, 1% Sodium Pyruvate) and a stainless-steel bead. Samples were stored  
at -80°C.

**Human primary cells.** The human fibroblasts and keratinocytes were purchased and qualified  
375 by ATCC. Cells were seeded into 12-well plates 1 day before infection to allow them reach 90%  
confluence. Mixtures of ZIKVs (1 PFU/cell MOI) were added into the cells and incubated at 37°C  
for 2 hours. Titers of viruses before mixing were plaque assayed to verify proper concentrations.  
Also, an aliquot of the inoculum was reserved for estimating the initial ratio of the viruses. After  
incubation, the cells were washed 3 times with 1ml of PBS. The infected cells were cultured,  
380 and the supernatant were collected from days 1-5. Samples were stored at -80°C for further  
analysis.

**Sample preparation and Nucleic acid extraction.** Aliquots of mosquito lysates, mouse serum,  
mouse organ lysates and human primary cell supernatant samples were prepared in RNeasy  
385 Mini Kit (Qiagen) lysis buffer RLT (400 $\mu$ l), and nucleic acids were subsequently extracted  
according to the manufacturer's protocol. After extraction, a portion of the RNA was immediately  
applied to a one step RT-PCR assay and the remaining material was archived at -80°C.

**Quantitative real-time RT-PCR assays.** Prior to Sanger sequencing analysis, virus-positive  
390 samples were identified by quantitative real-time RT-PCR, which was performed using a  
QuantiTect Probe RT-PCR Kit (Qiagen) on the LightCycler 480 system (Roche,  
Rotkreuz, Switzerland) following the manufacturer's protocol. The primers and probes are listed  
in Extended Data Table 3. The absolute quantification of ZIKV RNA was determined using a  
standard curve with in vitro-transcribed, full-length ZIKV RNAs.

395  
**Reverse transcriptase PCR.** 400-500 bp of RT-PCR product were synthesized and amplified  
from extracted RNA using a SuperScript™ III One-Step RT-PCR kit (Invitrogen, Carlsbad, CA,  
USA). 20 $\mu$ l reactions were assembled in PCR 8-tube strips through the addition of 10 $\mu$ l 2X  
reaction mix, 0.4 $\mu$ l SuperScript™ III RT/Platinum™ Taq Mix, 0.8 $\mu$ l 10  $\mu$ M specific forward  
400 primer, 0.8 $\mu$ l 10  $\mu$ M specific reverse primer (see Extended Data Table 2), 4 $\mu$ l of extracted RNA  
and 6 $\mu$ l Rnase-free water. RT was completed using the following protocol: 1) 55°C, 30 min;  
94°C, 2 min; 2) 94°C, 15s; 60°C, 30s; 68°C, 1min; 40 cycles; 3) 68°C, 5 min; 4) indefinite hold at  
4°C. 2 $\mu$ l of generated PCR products were loaded to 1% DNA agarose gel to verify the size. The  
left samples were purified by a QIAquick PCR Purification kit (Qiagen) according to the

405 manufacturer's protocol. The concentration of RT-PCR products >10 ng/ul were qualified following Sanger sequencing.

**Sanger sequencing and electropherogram peak height analysis.** Sequences of the purified RT-PCR products (concentration >10 ng/ul) were generated using a BigDye Terminator v3.1 cycle sequencing kit (Applied Biosystems, Austin, TX, USA). The products of the sequencing reactions were then purified using a 96-well plate format (EdgeBio, San Jose, CA, USA), and then analyzed on a 3500 Genetic Analyzer (Applied Biosystems). The peak electropherogram height representing each mutation site and proportion of each competitor was analyzed using the QSVanalyser program<sup>39</sup>.

415

#### **Intrathoracic inoculation of mosquitoes.**

The intrathoracic microinjection of ZIKV into mosquitoes has been described previously<sup>40</sup>. Female mosquitoes were anaesthetized on a cold tray (0°C). Then, a defined titer (1 pfu in 100 nl total inoculum volume) of mixed ZIKV strains were inoculation into the mosquito thorax with a Nanoject III (Drummond, Pennsylvania, USA). Six days later, the infected mosquitoes were allowed to feed on A129 mice to transmit ZIKV.

420

#### **Membrane blood feeding.**

Seven-day-old female mosquitoes were placed into mesh-covered cartons and provided cotton balls containing 10% sucrose. Complement-inactivated sheep blood was mixed with different ZIKV combinations for mosquito feeding via a Hemotek system membrane feeder (5W1, Hemotek limited, Lancashire, UK). The total viral titers of the two competing ZIKVs in the blood meals were  $1 \times 10^6$  PFU/ml. Fully engorged mosquitoes were incubated for 14 days until harvest. At that time, live mosquitoes were killed by freezing and homogenized individually (TissueLyser II, Qiagen) for RNA isolation and real-time qPCR detection. The infected mosquito RNAs were RT-PCR amplified, followed by Sanger sequencing.

430

#### **Mosquito feeding on infected mice.**

Ten female mosquitoes were placed into mesh-covered cartons for blood feeding following sugar-starvation for 24 hrs. ZIKV-infected A129 mice were anaesthetized with ketamine and placed on the top of the cartons for 20 min of feeding in the dark. Then, fully engorged mosquitoes were transferred to new containers and incubated for 14 days prior to RT-PCR, followed by Sanger sequencing of amplicons.

435

#### **Plaque assay.**

The plaque assay was performed on Vero cells following procedures described previously<sup>41</sup>. In brief, Vero cells were seeded into 12-well plates 12 to 16 hours prior to the plaque assay. 25 µl of each sample were used for 10-fold serial dilutions. For each dilution, 200 µl were added to 12-well plates with 90% confluent Vero cells. The cells were incubated at 37 °C with 5% CO<sub>2</sub> for 1h with gentle rocking every 15 min. After that, 1 ml of overlay (DMEM, 2% FBS, containing 0.8% methyl cellulose with 1% antibiotics) was added onto each well. The plates were cultured at 37°C with 5% CO<sub>2</sub> for 4 days until clear plaques formed. The plates were fixed in 4% formaldehyde solution for 2 hours and stained with 1% crystal violet.

445

#### **Focus-forming assay.**

The FFA was performed on C6/36 mosquito cells as described previously<sup>21</sup>. In brief, C6/36 cells were seeded into 12-well plates 12-16 h prior to the assay. A 25 µl volume of each sample was

450

used for 10-fold serial dilutions. For each dilution, 200  $\mu$ l were added to 12-well plates with 90%  
confluent cells. The cells were incubated at 30°C with 5% CO<sub>2</sub> for 1h with gentle rocking every  
455 15 min. After a 5-day incubation, plates were fixed with methanol / acetone (1:1), washed by  
PBS, and blocked with 2% FBS/PBS before overnight incubation with mouse anti-ZIKV  
antibody (4G2). Plates were washed and incubated with goat anti-mouse secondary antibody  
conjugated to horseradish peroxidase (KPL, Gaithersburg, MD, USA), then washed and  
developed with aminoethyl carbazole solution (Enzo Diagnostics, Farmingdale, NY, USA)  
460 prepared according to the manufacturer's protocol for detection of infection foci.

### Construction of ZIKV mutant infectious clones.

The ZIKV FSS13025 full-length cDNA infectious clone pFLZIKV-FSS<sup>41</sup> (referred as FSS-WT in  
text) was used as the backbone for engineering FSS-T106A, FSS-V1A, FSS-A188V, FSS-  
465 M872V and FSS-4M mutants. The ZIKV Dakar 41525 full-length cDNA infectious clone  
pFLZIKV-DK (referred as DK-WT in text) was used as the backbone for engineering DK-A106T,  
DK-A1V, DK-V188A, DK-V872M and DK-4M mutants. Standard overlapping PCR was  
performed to amplify the cDNA fragment between unique restriction enzyme sites that contained  
the corresponding mutations. Afterward, the fragments were cloned into pFLZIKV-FSS or  
470 pFLZIKV-DK plasmids and propagated in *E. coli* strain Top 10 (ThermoFisher Scientific,  
Framingham, MA, USA). All restriction enzymes were purchased from New England BioLabs  
(Massachusetts, USA). The plasmids were validated by restriction enzyme digestion and  
Sanger DNA sequencing. All primers were synthesized from Integrated DNA Technologies and  
are available upon request.

475

### RNA transcription, electroporation and virus recovery.

The full-length cDNA clone plasmids of all ZIKVs were linearized with restriction enzyme ClaI  
prior to RNA transcription. The linearized DNAs were purified by phenol-chloroform extraction  
and ethanol precipitation. RNA transcripts of ZIKVs were synthesized using the T7 mMessage  
480 mMachine kit (Ambion, California, USA) *in vitro*. The quantity and quality of RNAs were verified  
by Spectrophotometry (DS-11, DeNovix, Delaware, USA) and Agarose gel electrophoresis. For  
RNA transfection, 10  $\mu$ g of transcribed RNA were electroporated into  $8 \times 10^6$  Vero cells using the  
Gene Pulser Xcell™ Electroporation Systems (Bio-rad, California, USA) under as described  
previously<sup>41</sup>. The viral culture supernatant was harvested when obvious cytopathic effects  
485 (CPE) of the transfected Vero cells were observed, and the titers of all ZIKVs were measured on  
Vero cells using plaque assays<sup>41</sup>.

### Statistics.

490 Animals were randomly allocated to different groups. Mosquitoes that died before measurement  
were excluded from the analysis. The investigators were not blinded to the allocation during the  
experiments or to the outcome assessment. No statistical methods were used to predetermine  
the sample size. Descriptive statistics are provided in the figure legends. Linear regression  
analysis was used to assess the correlation between WT/Mutant ratios by Sanger sequencing  
495 and WT/Mutant ratios by PFU. Analysis was performed in Prism version 7.03 (GraphPad, San  
Diego, 440 CA).

For virus competition experiments in mosquitoes, A129 mice and human primary cells, relative  
replicative fitness values for viruses in each sample were analyzed according to  $w=(f_0/i_0)$ ,  
where  $i_0$  is the initial ratio of one competitor and  $f_0$  is the final ratio after competition. Sanger  
500 sequencing (initial timepoint T0) counts for each virus strain being compared (for example, wild-  
type versus mutant strains) were based upon average counts over several replicate samples of

inocula or bloodmeals per experiment (effectively averaging the replicates), and post-infection (timepoint T1) counts were taken from samples of individual subjects, such that for each strain the ratio between counts at T0 and T1 ( $T1/T0$ ) reflects a measure of a sample from a single  
505 mosquito, mouse or cell culture well in a specific experiment for that strain. Typically, multiple experiments were performed, so that  $f0/i0$  was clustered by experiment. To model  $f0/i0$ , the ratio  $T0/T1$  was found separately for each subject in each strain group, log (base-10) transformed to an improved approximation of normality, and modeled by analysis of variance with relation to group, adjusting by experiment to control for clustering within experiment. Specifically, the  
510 model was of the form  $\text{Log}_{10\_CountT1overCountT0} \sim \text{Experiment} + \text{Group}$ . Fitness ratios between the two groups [the model's estimate of  $w=(f0/i0)$ ] were assessed per the coefficient of the model's Group term, which was transformed to the original scale as  $10^{\text{coefficient}}$ . This modeling approach compensates for any correlation due to clustering within experiment similarly to that of corresponding mixed effect models, and is effective since the number of  
515 experiments was small. Statistical analyses were performed using R statistical software (R Core Team, 2019, version 3.6.1). In all statistical tests, two-sided  $\alpha=.05$ . Catseye plots<sup>42</sup>, which illustrate the normal distribution of the model-adjusted means, were produced using the "catseyes" package<sup>43</sup>.

**Data availability.**

520 Extended Data and source data for generating main figures are available in the online version of the paper. Any other information is available upon request.

## Acknowledgments

525 S.C.W was supported by NIH grants AI120942 and 121452. P.-Y.S. was supported by NIH grants AI142759, AI127744, and AI136126, and awards from the Kleberg Foundation, John S. Dunn Foundation, Amon G. Carter Foundation, Gilson Longenbaugh Foundation, and Summerfield Robert Foundation. J. L. was supported by the McLaughlin Fellowship Fund. We thank Aaron Brault for helpful suggestions for the manuscript.

## Author Contributions

530

S.C.W., J.L., Y.L., C.S., and P.-Y.S. designed the experiments and/or wrote the manuscript; J.L. and Y.L. performed the majority of the experiments and analyzed the data; S.C., B.T.D.N., and P.-Y.S. developed the reverse genetic system for ZIKV strains; R.M. and N.V. provided the mosquito colonies; R.M. assisted in mosquito collection; S.L.H. assisted in designing the

535

competition assay; G.H.R. and S.R.A provide the A129 mice colonies; C.R.A. assisted with statistics analyses; K.P. provided ZIKV parental strains and contributed experimental suggestions. All authors reviewed, critiqued and provided comments on the text.

### **Competing Interests statement**

540 The authors declare that they have no competing financial interests. Correspondence and requests for materials should be addressed to S.C.W. (sweaver@utmb.edu) or P.-Y.S. (peshi@utmb.edu).



## References.

- 545 1 Dick, G. W., Kitchen, S. F. & Haddow, A. J. Zika virus. I. Isolations and serological specificity. *Trans. R. Soc. Trop. Med. Hyg.* **46**, 509-520 (1952).
- 2 Grard, G. *et al.* Zika virus in Gabon (Central Africa)--2007: a new threat from *Aedes albopictus*? *PLoS Negl. Trop. Dis.* **8**, e2681, doi:10.1371/journal.pntd.0002681 (2014).
- 550 3 Duffy, M. R. *et al.* Zika virus outbreak on Yap Island, Federated States of Micronesia. *N. Engl. J. Med.* **360**, 2536-2543, 10.1056/NEJMoa0805715 (2009).
- 4 Cao-Lormeau, V. M. *et al.* Zika virus, French polynesia, South pacific, 2013. *Emerg. Infect. Dis.* **20**, 1085-1086, doi:10.3201/eid2006.140138 (2014).
- 5 Oehler, E. *et al.* Zika virus infection complicated by Guillain-Barre syndrome--case report, French Polynesia, December 2013. *Euro. Surveill.* **19**, (2014).
- 555 6 Campos, G. S., Bandeira, A. C. & Sardi, S. I. Zika Virus Outbreak, Bahia, Brazil. *Emerg. Infect. Dis.* **21**, 1885-1886, doi:10.3201/eid2110.150847 (2015).
- 7 Brasil, P. *et al.* Zika Virus Infection in Pregnant Women in Rio de Janeiro. *N. Eng. J. Med.* **375**, 2321-2334, doi:10.1056/NEJMoa1602412 (2016).
- 560 8 Aliota, M. T. *et al.* Zika in the Americas, year 2: What have we learned? What gaps remain? A report from the Global Virus Network. *Antiviral Res.* **144**, 223-246, doi:10.1016/j.antiviral.2017.06.001 (2017).
- 9 Haddow, A. D. *et al.* Genetic characterization of Zika virus strains: geographic expansion of the Asian lineage. *PLoS Negl. Trop. Dis.* **6**, e1477, doi:10.1371/journal.pntd.0001477 (2012).
- 565 10 Moudy, R. M., Meola, M. A., Morin, L. L., Ebel, G. D. & Kramer, L. D. A newly emergent genotype of West Nile virus is transmitted earlier and more efficiently by *Culex* mosquitoes. *Am. J. Trop. Med. Hyg.* **77**, 365-370, doi: org/10.4269/ajtmh.2007.77.365 (2007).
- 570 11 Brault, A. C. *et al.* Venezuelan equine encephalitis emergence: Enhanced vector infection from a single amino acid substitution in the envelope glycoprotein. *Proc. Natl. Acad. Sci. U.S.A.* **101**, 11344-11349, doi: 10.1073/pnas.0402905101 (2004).
- 12 Weaver, S. C., Charlier, C., Vasilakis, N. & Lecuit, M. Zika, Chikungunya, and Other Emerging Vector-Borne Viral Diseases. *Annu. Rev. Med.* **69**, 395-408, doi:10.1146/annurev-med-050715-105122 (2018).
- 575 13 Domingo, E. & Holland, J. J. in *Evolutionary Biology of Viruses* (ed S S Morse). 161-184, (Raven Press, 1994).
- 14 Liu, Y. *et al.* Evolutionary enhancement of Zika virus infectivity in *Aedes aegypti* mosquitoes. *Nature* **545**, 482-486, doi:10.1038/nature22365 (2017).
- 580 15 Azar, S. R., Diaz-Gonzalez, E. E., Danis-Lonzano, R., Fernandez-Salas, I. & Weaver, S. C. Naturally infected *Aedes aegypti* collected during a Zika virus outbreak have viral titres consistent with transmission. *Emerg. Microbes Infect.* **8**, 242-244, doi:10.1080/22221751.2018.1561157 (2019).
- 16 Shan, C. *et al.* A Zika virus envelope mutation preceding the 2015 epidemic enhances virulence and fitness for transmission. *Proc. Natl. Acad. Sci. U.S.A.* **117**, 20190-20197, doi:10.1073/pnas.2005722117 (2020).
- 585 17 Yuan, L. *et al.* A single mutation in the prM protein of Zika virus contributes to fetal microcephaly. *Science* **358**, 933-936, doi: 10.1126/science.aam7120 (2017).
- 18 Pettersson, J. H. *et al.* How Did Zika Virus Emerge in the Pacific Islands and Latin America? *MBio.* **7**, doi:10.1128/mBio.01239-16 (2016).
- 590 19 Mier, Y. T.-R. L., Tatem, A. J. & Johansson, M. A. Mosquitoes on a plane: Disinsection will not stop the spread of vector-borne pathogens, a simulation study. *PLoS Negl. Trop. Dis.* **11**, e0005683, doi:10.1371/journal.pntd.0005683 (2017).

- 595 20 Duarte, E. A. *et al.* Subclonal components of consensus fitness in an RNA virus clone. *J. Virol.* **68**, 4295-4301 (1994).
- 21 Roundy, C. M. *et al.* Variation in *Aedes aegypti* Mosquito Competence for Zika Virus Transmission. *Emerg. Infect. Dis.* **23**, 625-632, doi:10.3201/eid2304.161484 (2017).
- 22 Weger-Lucarelli, J. *et al.* Vector Competence of American Mosquitoes for Three Strains of Zika Virus. *PLoS Negl. Trop. Dis.* **10**, e0005101, doi:10.1371/journal.pntd.0005101 (2016).
- 600 23 Smith, D. R. *et al.* African and Asian Zika Virus Isolates Display Phenotypic Differences Both *In Vitro* and *In Vivo*. *Am. J. Trop. Med. Hyg.* **98**, 432-444, doi:10.4269/ajtmh.17-0685 (2018).
- 24 Duggal, N. K. *et al.* Differential Neurovirulence of African and Asian Genotype Zika Virus Isolates in Outbred Immunocompetent Mice. *Am. J. Trop. Med. Hyg.* **97**, 1410-1417, doi:10.4269/ajtmh.17-0263 (2017).
- 605 25 Wisner, M. J. & Lenski, R. E. A Comparison of Methods to Measure Fitness in *Escherichia coli*. *PLoS One* **10**, e0126210, doi:10.1371/journal.pone.0126210 (2015).
- 26 Grubaugh, N. D. *et al.* Genetic Drift during Systemic Arbovirus Infection of Mosquito Vectors Leads to Decreased Relative Fitness during Host Switching. *Cell Host Microbe* **19**, 481-492, doi:10.1016/j.chom.2016.03.002 (2016).
- 610 27 Bergren, N. A. *et al.* "Submergence" of Western equine encephalitis virus: Evidence of positive selection argues against genetic drift and fitness reductions. *PLoS Pathog.* **16**, e1008102, doi:10.1371/journal.ppat.1008102 (2020).
- 615 28 Coffey, L. L. & Vignuzzi, M. Host alternation of chikungunya virus increases fitness while restricting population diversity and adaptability to novel selective pressures. *J. Virol.* **85**, 1025-1035, doi:10.1128/JVI.01918-10 (2011).
- 29 Lazear, H. M. *et al.* A Mouse Model of Zika Virus Pathogenesis. *Cell Host Microbe* **19**, 720-730, doi:10.1016/j.chom.2016.03.010 (2016).
- 620 30 Rossi, S. L. *et al.* Characterization of a Novel Murine Model to Study Zika Virus. *Am. J. Trop. Med. Hyg.* **94**, 1362-1369, doi:10.4269/ajtmh.16-0111 (2016).
- 31 Hamel, R. *et al.* Biology of Zika virus infection in human skin cells. *J. Virol.* **89**, 8880-8896, doi: 10.1128/JVI.00354-15 (2015).
- 625 32 Kim, J. A., Seong, R. K., Son, S. W., & Shin, O. S. Insights into ZIKV-mediated innate immune responses in human dermal fibroblasts and epidermal keratinocytes. *J. Invest. Dermatol.* **139**, 391-399, doi: 10.1016/j.jid.2018.07.038 (2019).
- 33 Chen, R., Wang, E., Tsetsarkin, K. A. & Weaver, S. C. Chikungunya virus 3' untranslated region: adaptation to mosquitoes and a population bottleneck as major evolutionary forces. *PLoS Pathog.* **9**, e1003591, doi:10.1371/journal.ppat.1003591 (2013).
- 630 34 Tsetsarkin, K. A. *et al.* Chikungunya virus emergence is constrained in Asia by lineage-specific adaptive landscapes. *Proc. Natl. Acad. Sci. U. S. A.* **108**, 7872-7877, doi:10.1073/pnas.1018344108 (2011).
- 35 Stapleford, K. A. *et al.* Whole-Genome Sequencing Analysis from the Chikungunya Virus Caribbean Outbreak Reveals Novel Evolutionary Genomic Elements. *PLoS Negl. Trop. Dis.* **10**, e0004402, doi:10.1371/journal.pntd.0004402 (2016).
- 635 36 Hill, S. C. *et al.* Emergence of the Asian lineage of Zika virus in Angola: an outbreak investigation. *Lancet Infect. Dis.* **19**, 1138-1147, doi:10.1016/S1473-3099(19)30293-2 (2019).
- 37 Saiz, J. C., Vázquez-Calvo, Á., Blázquez, A. B., Merino-Ramos, T., Escribano-Romero, E., & Martín-Acebes, M. A. Zika virus: the latest newcomer. *Front. Microbiol.* **7**, 496. <https://doi.org/10.3389/fmicb.2016.00496> (2016).
- 640 38 Tsetsarkin, K. A. *et al.* Multi-peaked adaptive landscape for chikungunya virus evolution predicts continued fitness optimization in *Aedes albopictus* mosquitoes. *Nat. Commun* **5**, 1-14, doi: <https://doi.org/10.1038/ncomms5084> (2014).

- 645 39 Carr, I. M. *et al.* Inferring relative proportions of DNA variants from sequencing  
electropherograms. *Bioinformatics* **25**, 3244-3250, doi: 10.1093/bioinformatics/btp583  
(2009).
- 40 Liu, J. *et al.* Flavivirus NS1 protein in infected host sera enhances viral acquisition by  
mosquitoes. *Nat. Microbiol.* **1**, 1-11, doi: <https://doi.org/10.1038/nmicrobiol.2016.87>  
650 (2016).
- 41 Shan, C. *et al.* An infectious cDNA clone of Zika virus to study viral virulence, mosquito  
transmission, and antiviral inhibitors. *Cell Host Microbe* **19**, 891-900, doi:  
org/10.1016/j.chom.2016.05.004. (2016).
- 42 Cumming, G. (2014). The new statistics: Why and how. *Psychol Sci* **27**, 7-29.  
655 doi:10.1177/0956797613504966 (2014).
- 43 Clark Andersen (2019). *catseyes*: Create Catseye Plots Illustrating the Normal  
Distribution of the Means. R package version 0.2.3.

## Figure legends and Table.

660 **Figure 1. African lineage ZIKV and post-epidemic Asian lineage ZIKV had the fitness advantage versus pre-epidemic Asian lineage ZIKVs in both A129 mice and mosquitoes**

665 **a**, Experimental design of competition fitness assays. African lineage ZIKV and post-epidemic Asian lineage ZIKV were mixed with pre-epidemic Asian lineage ZIKV at an approximate ratio of 1:1 respectively. The initial 1:1 ratios of mixed virus were confirmed by RT-PCR, followed by Sanger sequencing of replicons and polymorphic nucleotide peaks analysis. The ZIKV mixture was engorged by mosquitoes through membrane blood feeding or biting an infected A129 mouse at the viremia peak 3 days post-infection. The mosquitoes were sacrificed after 14 days of incubation, the ZIKV population amplified by RT-PCR, and the amplicon Sanger-sequenced. The blood and organs of infected mice were collected 3- or 8-days post-infection, respectively.

670 All the mosquitoes and mouse specimens were subjected to RT-PCR amplification and Sanger sequencing to compare the ZIKV strain ratio after competition, and each point represents a single mosquito or mouse sample. Relative fitness values were compared among multiple competition replicates to determine if fitness of the competitors differed. **b**, Fitness comparison between African (Dakar 41525), Asian pre-epidemic (FSS13025) and American (PRVABC59) ZIKV strains in *A. aegypti*. The relative replicative fitness value  $w$  was analyzed according to  $w=(f_0/i_0)$ , where  $i_0$  is the initial ratio of the Dakar 41525 or PRVABC59 competitor to the FSS13025 strain, determined from Sanger sequence electropherogram peaks, and  $f_0$  is the final ratio. **c**, Fitness comparison of African (Dakar 41525), Asian pre-epidemic (FSS13025) and American (PRVABC59) ZIKV strains in mouse blood, using the same method as for panel b. **d**, Fitness comparison of African (Dakar 41525), Asian pre-epidemic (FSS13025) and American (PRVABC59) ZIKV strains in mosquitoes after feeding on the viremic mice shown in panel c, and extrinsic incubation, using the same method as for panel b. **b-d**, The distribution of the model-adjusted means is illustrated by catseye plots with shaded +/- standard errors overlaid by scatterplots of individual relative fitness values; scatterplots have been randomly jittered horizontally for clarity, and are shown on the log (base-10) scale such that comparisons are against a null value of 1.

685

690 **Figure 2. Four amino acids determine much of the fitness difference between different ZIKV strains in both mosquitoes and A129 mice.**

695 **a**, The hypothetical diagram of fitness changes following the spread of ZIKV from Africa to Asia and the Americas, including strains used for fitness assays. **b**, Schematic representation of competition fitness assay in mosquito bodies, legs and saliva. **c**, **e**, Fitness comparison between African and Asian lineage, and the four amino-acid substitution mutants (DK-4M and FSS-4M) in mosquito bodies, legs and saliva. The mosquitoes acquired the ZIKV mixture through membrane blood feeding and were assayed at 14 days post-infection. The body (carcass), legs and saliva were collected from each individual mosquito and subjected to RT-PCR amplification and Sanger sequencing to determine relative fitness values of 4M over wt; each point represents a single mosquito or mouse sample. **d**, **f**, Competition between DK-WT and DK-4M(**d**), FSS-WT and FSS-4M (**f**) in mouse blood collected 3 days after infection. **g**, **h**, Fitness of DK-4M (**g**) and FSS-4M (**h**) in mosquitoes after oral infection from viremic mice. The mosquitoes acquired the virus through biting a viremic mouse 3 days after infection and were tested after 14 days of extrinsic incubation. **c-h**, The distribution of the model-adjusted means is illustrated by catseye plots with shaded +/- standard error bars overlaid by scatterplots of subject measures; scatterplots have been randomly jittered horizontally for clarity, and are shown on the log (base-10) scale such that comparisons are against a null value of 1.

705

**Figure 3. The fitness comparison of 4 individual mutant viruses against wild-type ZIKV strains in mosquitoes and A129 mice.**

710 **a-c**, The relative fitness of individual mutants in the Dakar strain, tested in mosquito bodies (**a**), legs (**b**) and saliva (**c**). **d-f**, The fitness comparison of individual reversion mutants in the FSS13025 strain, tested in mosquito bodies (**d**), legs (**e**) and saliva (**f**). **g,h**. Each point represents a single mosquito sample. The fitness comparison of DK-V188A (**g**) and FSS-A188V (**h**) versus wild-type strains in mouse blood. **i, j**, The fitness comparison of DK-V188A (**i**) and FSS-A188V (**j**) in mosquitoes after oral infection from viremic mice. **a-j**, The distribution of the model-adjusted means is illustrated by catseye plots with shaded +/- standard error overlaid by scatterplots of subject measures; scatterplots have been randomly jittered horizontally for clarity, and are shown on the log (base-10) scale such that comparisons are against a null value of 1.

720 **Figure 4. Fitness comparison of DK-4M and FSS-4M against wild-type ZIKV strains during a mosquito–host–mosquito transmission cycle.**

725 **a**, Schematic representation of the study design. 10 pfu of ZIKV WT and mutant viruses were intrathoracically injected into mosquitoes. After 6 days of extrinsic incubation, the infected mosquitoes fed on a A129 mice to transmit virus. Naïve mosquitoes were then employed to bite the infected A129 mice 3 days post-mouse infection. After an additional 14 days, the mosquitoes were harvested. All the mosquitoes and mice samples collected during the transmission cycle were analyzed by RT-PCR and Sanger sequencing. Each point represents a single mosquito or mouse sample. **b, c**, Fitness comparison of DK-4M (**b**) and FSS-4M (**c**) against wild-type viruses in mosquito salivary glands 6 days post-intrathoracic injection. **d, e**, Fitness of DK-4M (**d**) and FSS-4M (**e**) versus wild-type viruses in mouse blood. **f, g**, The fitness comparison of DK-4M (**f**) and FSS-4M(**g**) versus wild-type viruses in mosquitoes after oral infection from viremic mice. **b-g**, The distribution of the model-adjusted means is illustrated by catseye plots with shaded +/- standard error overlaid by scatterplots of subject measures; scatterplots have been randomly jittered horizontally for clarity, and are shown on the log (base-10) scale such that comparisons are against a null value of 1.

## Extended Data Figures and Tables

### Extended Data Fig. 1. Phylogenetic analysis of representative ZIKV strains.

- 740 **a**, Phylogenetic tree of representative Zika virus (ZIKV) strains based on 73 complete open  
reading frame sequences. The evolutionary distances were computed using the Maximum  
Composite Likelihood method. The percentage of replicate trees in which the associated taxa  
clustered together in the bootstrap tests were shown next to the branches (1000 replicates).  
Evolutionary analyses were performed in MEGA X, by using the Maximum Likelihood method.
- 745 **b**, Four reversion directly reverting mutations compared among representative African, Asian  
and American lineage strains.

### Extended Data Fig. 2. The trace history of four directly reverting amino acids in the evolutionary tree of Zika virus.

- 750 Trace history of four ZIKV amino acids performed in Mesquite (Version 3.61,  
<http://www.mesquiteproject.org>). These include: **a**. Amino acid 106 substitution of the capsid  
protein; **b**. Amino acid 1 of the pre-membrane (prM) protein; **c**. amino acid 188 of the  
nonstructural protein 1 (NS1), and; **d**. amino acid 872 of the nonstructural protein 5 (NS5) based  
on 73 complete zika virus open reading frame sequences.

755

### Extended Data Fig. 3. The consistency and accuracy validation of competition assay by Sanger sequencing.

- a, b**, The correlation between PFU input ratios and output ratios determined by Sanger  
sequencing of RT-PCR amplicons. The DK-WT/DK-4M (**a**) or FSS-WT/FSS-4M(**b**) ZIKVs were  
760 mixed at different ratios of 10:1, 5:1, 3:1, 1:1, 1:3, 1:5, 1:10 based on the PFU titer. The total  
RNA of these mixed virus was isolated and transcribed by RT-PCR. The ratios of DK-WT/DK-  
4M and FSS-WT/FSS-4M were calculated based on the peak heights by Sanger sequencing.  
Data were analyzed by linear regression with correlation coefficients ( $r$ ) and significance ( $p$ ). **c**,  
**d**, The ratio of wt/mutant virus mixture calculated by Sanger sequencing was consistent when  
765 using virus mixture that ranges from high to low titer. The DK-WT/DK-4M (**c**) or FSS-WT/FSS-  
4M(**d**) ZIKVs were mixed at a PFU ratio of 1:1. The total titers of the mixed viruses were  $10^6$ ,  
 $10^5$ ,  $10^4$  and  $10^3$  PFU. The total RNA of these mixed virus was isolated and transcribed by RT-  
PCR. The ratios of DK-WT/DK-4M and FSS-WT/FSS-4M were calculated based on the peak  
heights by Sanger sequencing.

770

### Extended Data Fig. 4. ZIKV WT and 4M mutant strain had a similar initial ratio when titrated on mammalian or insect cells.

- The initial ratio of DK-WT/DK-4M (**a**) and FSS-WT/FSS-4M (**b**) were calculated by the virus titer  
determined on Vero and C6/C36 cells. The titers of the WT and mutant viruses were determined  
775 by FFA (Focus-forming assay) on the cells before they were mixed.

### Extended Data Fig. 5. Fitness comparisons with additional Zika virus strains Dominican Republic *Aedes aegypti* mosquitoes.

- 780 **a**, The fitness of 2 African ZIKV strains (DK 41662) and (DK 41671) in competition with the  
Asian FSS13025 strain in mosquitoes. **b**, The fitness of 2 American ZIKV strains (R114916) and  
(HN-MF59) in competition with the FSS13025 Asian strain in mosquitoes. **c**. The fitness of ZIKV

African strain Dakar 41525, Asian pre-epidemic strain FSS13025 strain and American strain PRVABC59 in a low generation (F6) colonized *A. aegypti* strain from the Dominican Republic. Each point represents a single mosquito or mouse sample **a-c**, The distribution of the model-adjusted means is illustrated by catseye plots with shaded +/- standard error overlaid by scatterplots of subject measures; scatterplots have been randomly jittered horizontally for clarity, and are shown on the log (base-10) scale such that comparisons are against a null value of 1.

790 **Extended Data Fig. 6. Fitness comparisons of African and post-epidemic against a pre-epidemic ZIKV strains in different organs of A129 mice.**

**a**, Fitness comparison between African (Dakar 41525) and Asian pre-epidemic (FSS13025) ZIKV strains in different organs of A129 mice after 8 days of infection, when viremia had ended. **b**, The fitness comparison between Asian pre-epidemic (FSS13025) and American (PRVABC59) ZIKV strains in different organs of A129 mice after 8 days of infection, when viremia had ended. Each point represents a single mouse sample **a, b**, The distribution of the model-adjusted means is illustrated by catseye plots with shaded +/- standard error overlaid by scatterplots of subject measures; scatterplots have been randomly jittered horizontally for clarity, and are shown on the log (base-10) scale such that comparisons are against a null value of 1. \*  $P < 0.05$ , \*\*  $P < 0.01$ , \*\*\*  $P < 0.001$ .

**Extended Data Fig. 7. Fitness comparison of African and post-epidemic against a pre-epidemic ZIKV stain in human primary cells.**

**a**, Schematic representation of the study design. The mixed ZIKVs were inoculated into human fibroblast and keratinocyte cells. The RNAs in the culture supernatant were isolated, amplified by RT-PCR, Sanger-sequenced 3 days post infection. **b, c**, The fitness of ZIKV African strain (Dakar 41525), Asian pre-epidemic (FSS13025) strain and American strain (PRVABC59) in human primary fibroblast (**b**) and keratinocyte (**c**) cells. Each point represents a single culture sample The distribution of the model-adjusted means is illustrated by catseye plots with shaded +/- standard error overlaid by scatterplots of subject measures; scatterplots have been randomly jittered horizontally for clarity, and are shown on the log (base-10) scale such that comparisons are against a null value of 1.

815 **Extended Data Fig. 8. Fitness comparisons of Dakar-4 amino-acid mutant and FSS13025-4 amino-acid mutant against wild-type viruses in different organs of A129 mice.**

**a**, Fitness comparison between Dakar 4-amino acid mutant (DK-4M) and the wild-type strain in different organs of A129 mice. **b**, The fitness comparison between FSS 4 amino-acid mutant (FSS-4M) and wild-type strain in different organs of A129 mice. Each point represents a single mouse sample. **a, b**, The distribution of the model-adjusted means is illustrated by catseye plots with shaded +/- standard error overlaid by scatterplots of subject measures; scatterplots have been randomly jittered horizontally for clarity, and are shown on the log (base-10) scale such that comparisons are against a null value of 1. \*  $P < 0.05$ , \*\*  $P < 0.01$ , \*\*\*  $P < 0.001$ , n.s. not significant.

825 **Extended Data Fig. 9. Fitness comparisons of Dakar-4 amino-acid mutant and FSS13025-4 amino-acid mutant versus wild-type ZIKV strains in human primary cells.**

830 **a, b**, Fitness comparison between Dakar 4-amino acid mutant (DK-4M) and wild-type strain in human primary fibroblast (**a**) and keratinocyte (**b**) cells. **c, d**, The fitness comparison between FSS13025 4-amino acid mutant (FSS-4M) and wild-type strain in human primary fibroblast (**c**) and keratinocyte (**d**) cells. Each point represents a single culture sample. **a-d**, The distribution of the model-adjusted means is illustrated by catseye plots with shaded +/- standard error overlaid by scatterplots of subject measures; scatterplots have been randomly jittered horizontally for clarity, and are shown on the log (base-10) scale such that comparisons are against a null value of 1.

835

**Extended Data Fig. 10. Fitness comparison between NS1-188 mutants against wild-type ZIKV strains in different organs of A129 mice.**

840 **a**, Fitness comparison between Dakar NS1-V188A mutant and wild-type strain in different organs of A129 mice. **b**, Fitness comparison between FSS13025 NS1-A188V mutant and wild-type strain in different organs of A129 mice. Each point represents a single mouse sample **a, b**, The distribution of the model-adjusted means is illustrated by catseye plots with shaded +/- standard error overlaid by scatterplots of subject measures; scatterplots have been randomly jittered horizontally for clarity, and are shown on the log (base-10) scale such that comparisons are against a null value of 1. \*  $P < 0.05$ , \*\*  $P < 0.01$ , \*\*\*  $P < 0.001$ , n.s. not significant.

845

**Extended Data Fig. 11. Fitness comparison between African-4 amino-acid mutant and FSS13025-4 amino-acid mutant against wild-type viruses during mosquito-mouse-mosquito transmission cycle.**

850 **a**, Fitness comparison between Dakar 4-amino acid mutant (DK-4M) and wild-type strain in different organs of A129 mice after being bitten by infected mosquitoes. **b**, Fitness comparison between FSS 4-amino acid mutant (FSS-4M) and wild-type strain in different organs of A129 mice biting by infected mosquitoes. Each point represents a single mosquito or mouse sample **a, b**, The distribution of the model-adjusted means is illustrated by catseye plots with shaded +/- standard error overlaid by scatterplots of subject measures; scatterplots have been randomly jittered horizontally for clarity, and are shown on the log (base-10) scale such that comparisons are against a null value of 1. \*  $P < 0.05$ , \*\*  $P < 0.01$ , \*\*\*  $P < 0.001$ .

855

**Extended Data Table 1. Summary of amino acid differences between recent, pre-epidemic Asian and post-epidemic Asian/American lineage ZIKVs.**

860 Phenotypes assigned to these amino acid substitutions are summarized.

**Extended Data Table 2. The relative replicative fitness of ZIKV mutant strains in mosquitoes, mice and human primary cells.**

865 The relative replicative fitness of ZIKV mutant strains in mosquitoes, mice and human primary cells, derived from the data in the figures, are presented as the final ratio divided by the initial ratio of the two competing viruses, as used previously to compare adaptive chikungunya virus mutations<sup>38</sup>. P values are based on differences from equal fitness or a relative fitness value of 1.

870 **Extended Data Table 3. Primers and probes for gene cloning, qPCR, RT-PCR and Sanger sequencing.**



**a**

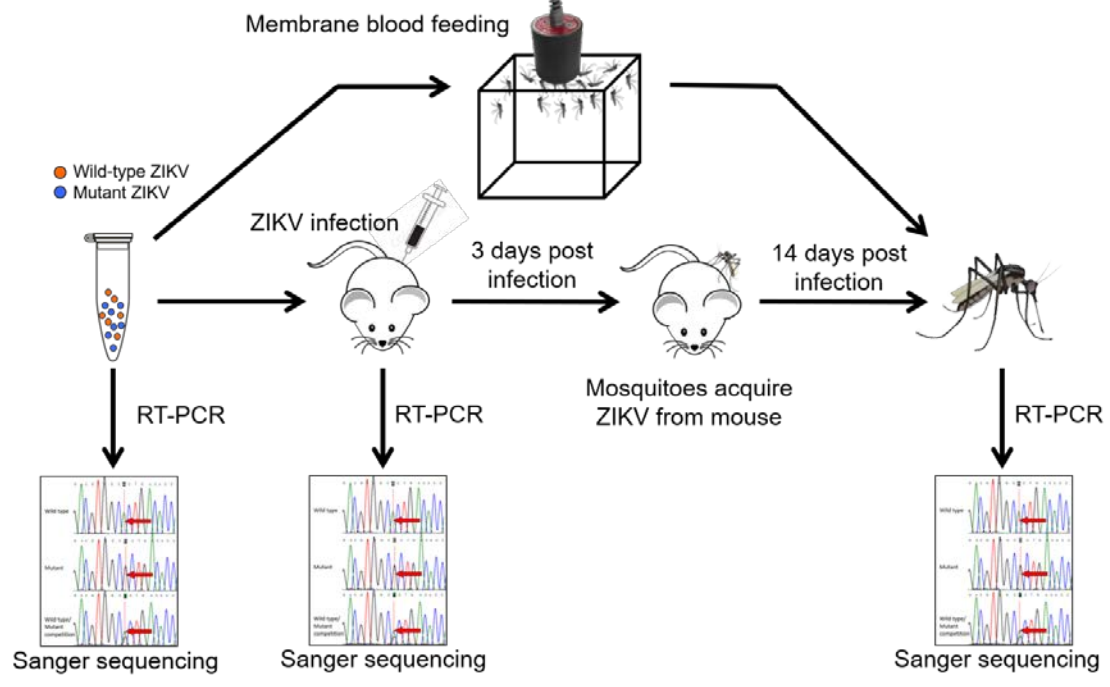

**b**

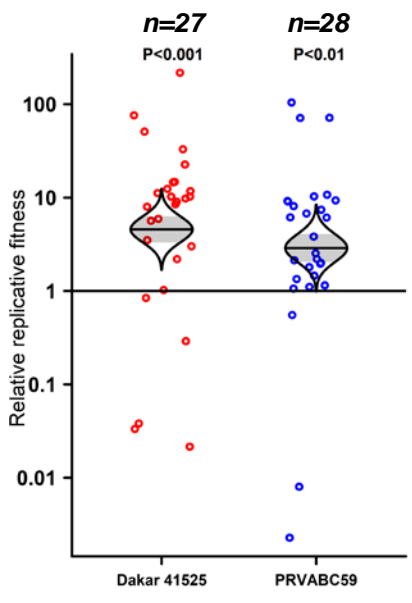

**c**

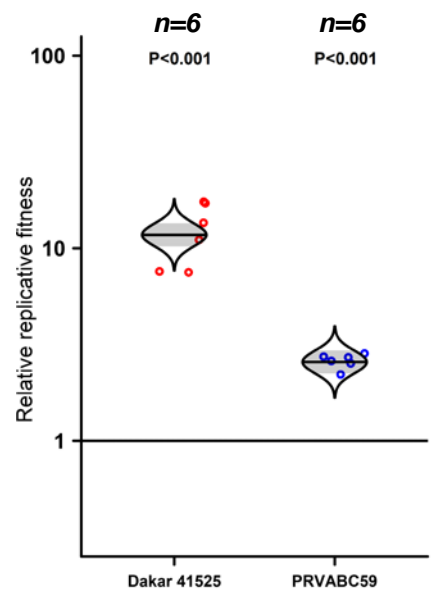

**d**

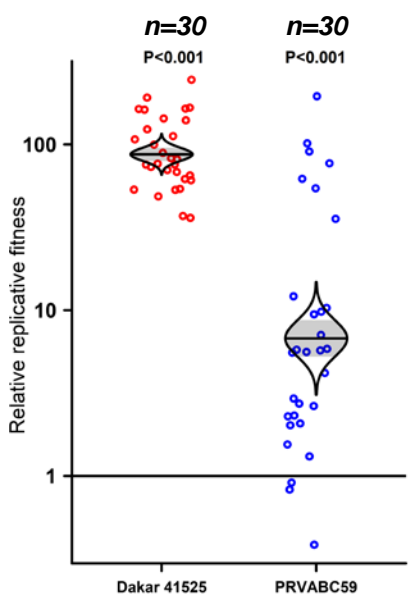

**■** Dakar 41525 (African lineage)  
**■** PRVABC59 (Post-epidemic Asian lineage)

**Figure 1**

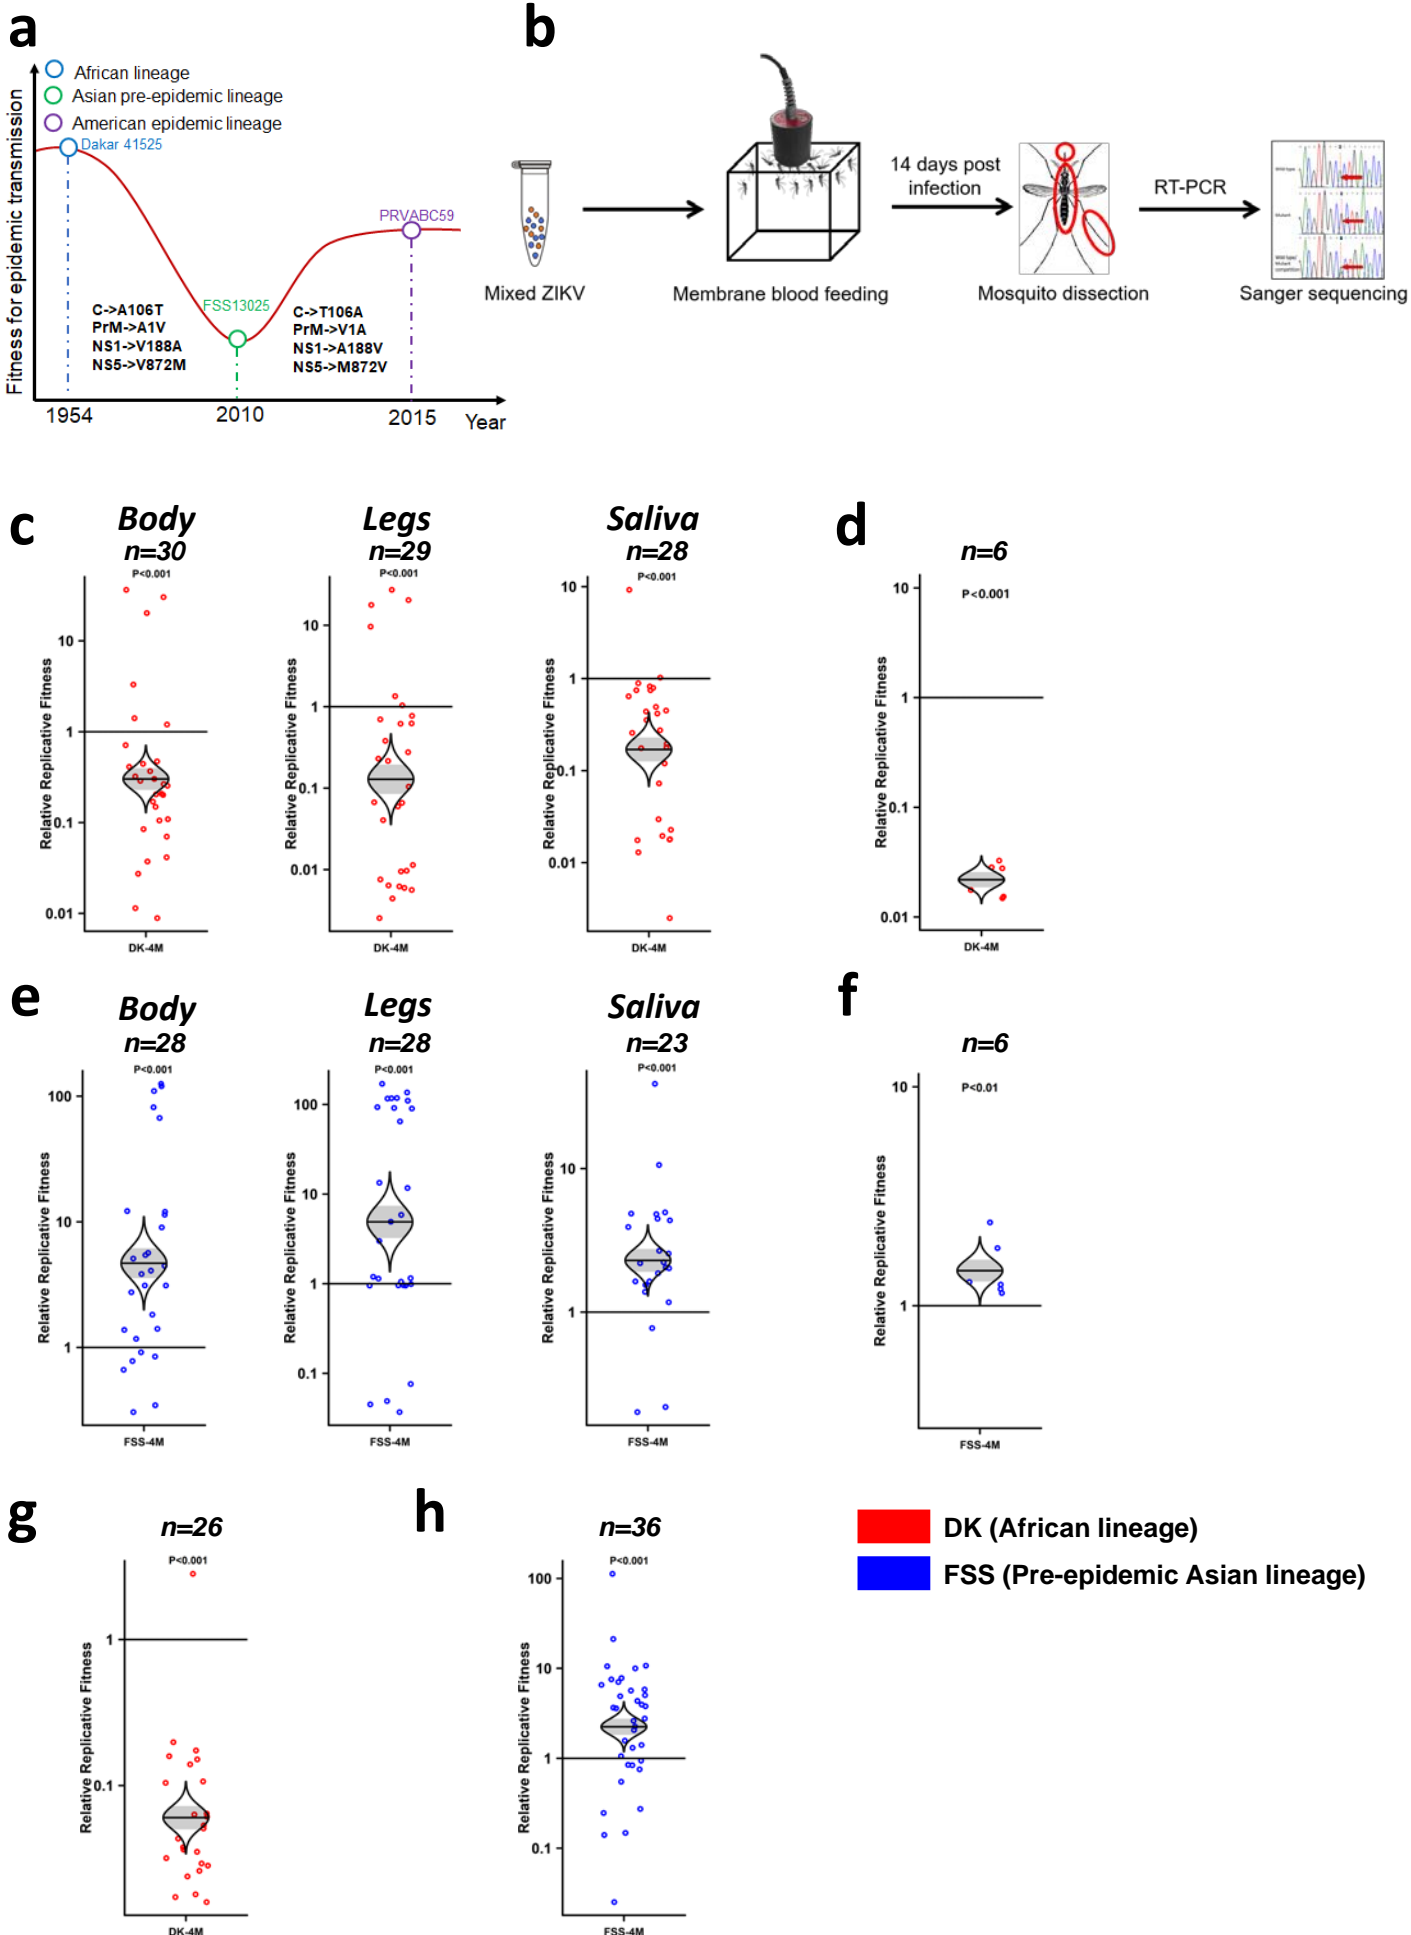

Figure 2

**a**

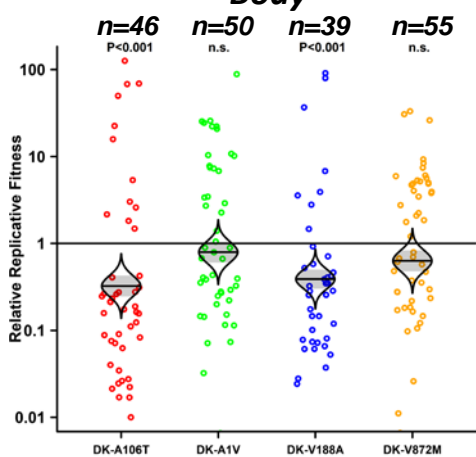

**b**

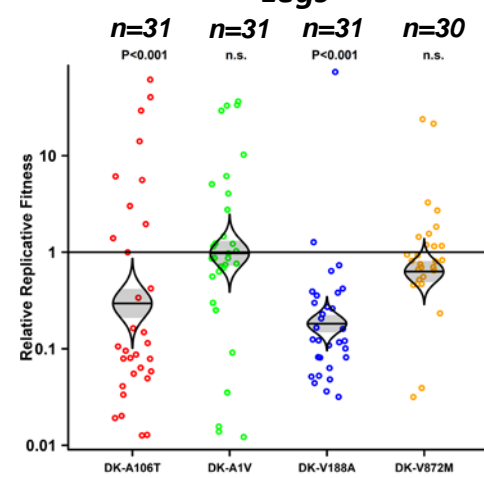

**d**

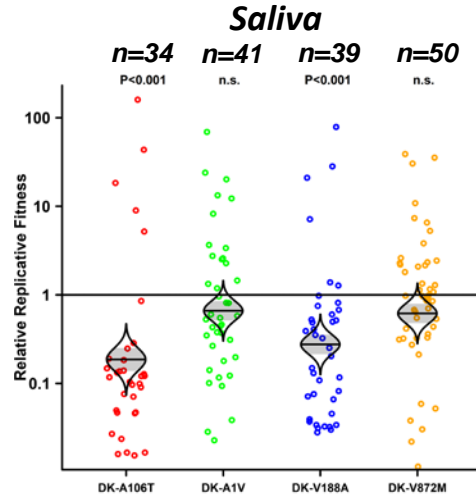

DK (African lineage)  
FSS (Pre-epidemic Asian lineage)

**d**

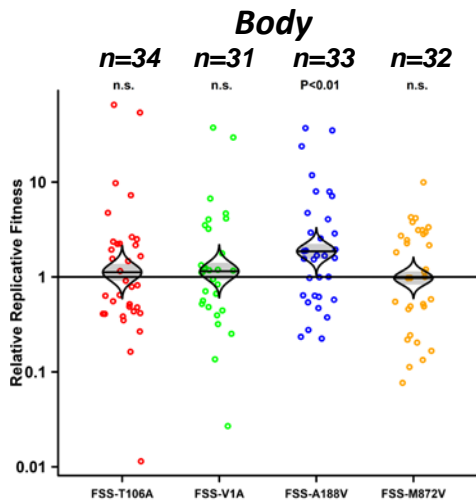

**e**

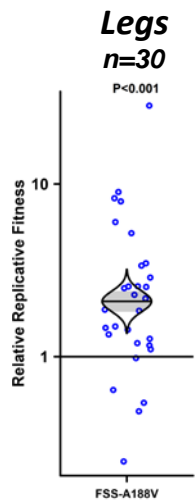

**f**

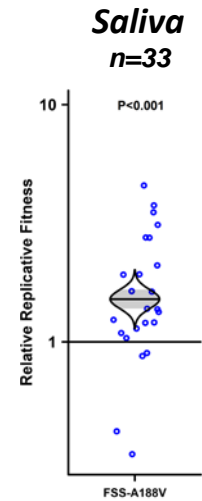

**g**

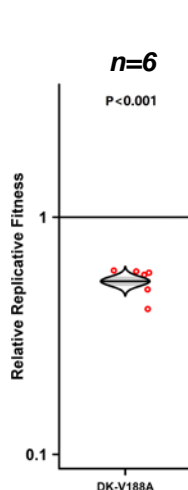

**h**

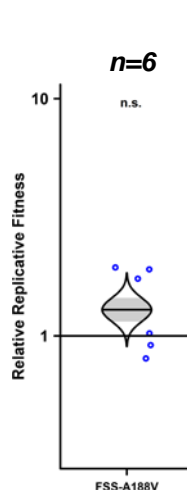

**i**

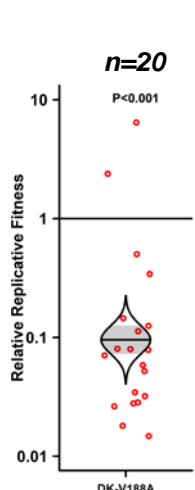

**j**

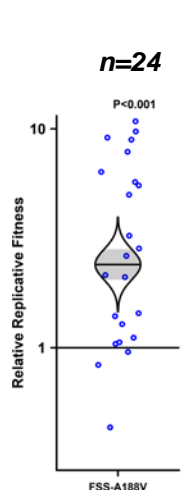

**Figure 3**

**a**

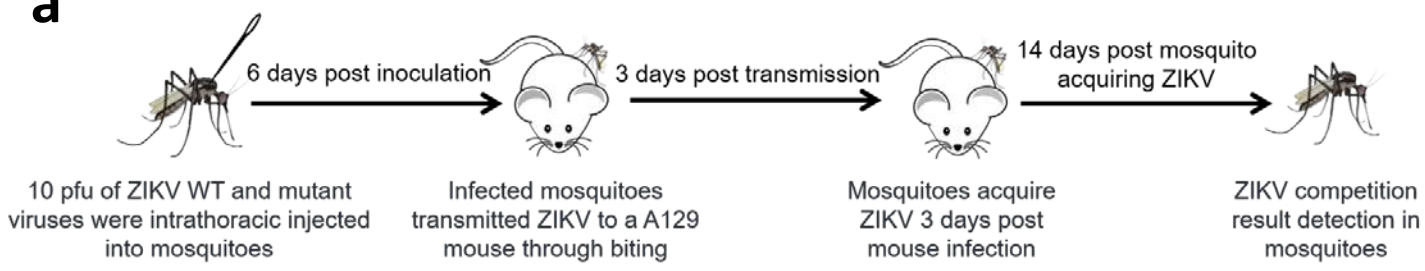

**b**

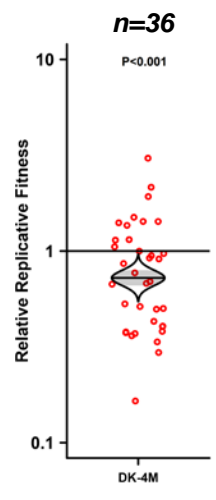

**c**

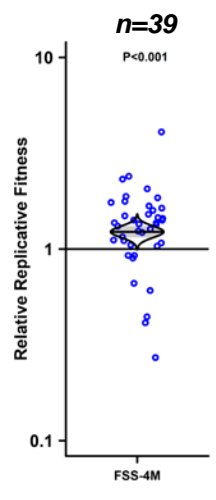

**DK (African lineage)**  
**FSS (Pre-epidemic Asian lineage)**

**d**

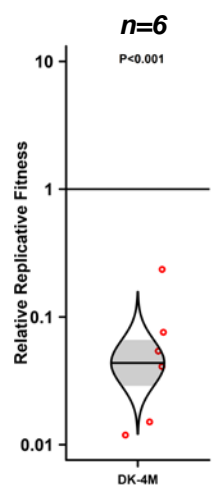

**e**

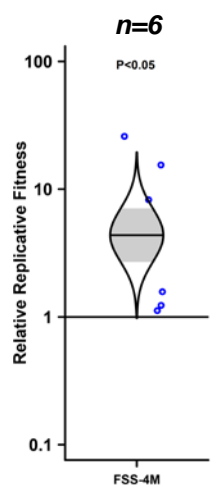

**f**

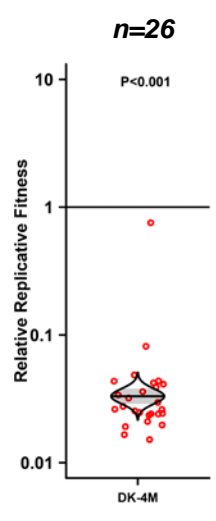

**g**

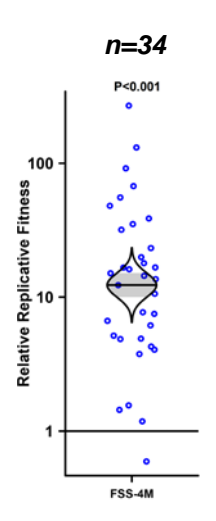

**Figure 4**

**a**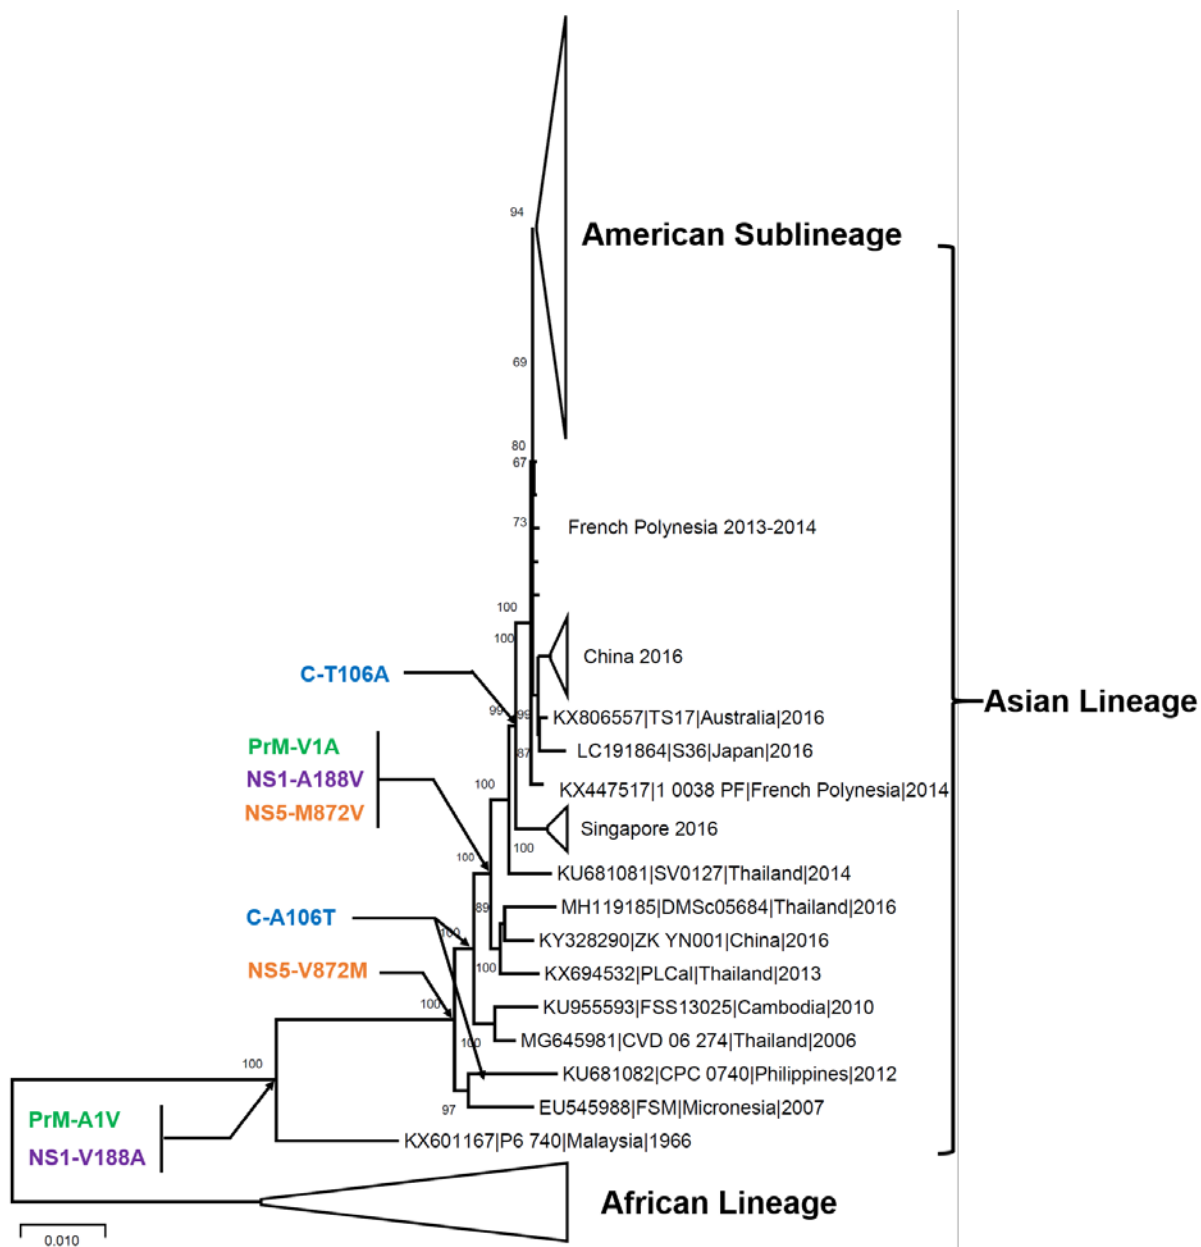**b**

| Position |            | African Lineage |            | Asian Lineage (Pre-epidemic) |            | Asian Lineage (American) |            |
|----------|------------|-----------------|------------|------------------------------|------------|--------------------------|------------|
| Gene     | Amino acid | Codon           | Amino acid | Codon                        | Amino acid | Codon                    | Amino acid |
| Capsid   | 106        | GCT             | A          | ACA                          | T          | GCA                      | A          |
| PrM      | 1          | GCC             | A          | GTG                          | V          | GCG                      | A          |
| NS1      | 188        | GTC             | V          | GCT                          | A          | GTT                      | V          |
| NS5      | 872        | GTG             | V          | ATG                          | M          | GTG                      | V          |

# Extended Data Figure 1

# Trace character

C\_106

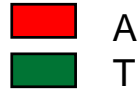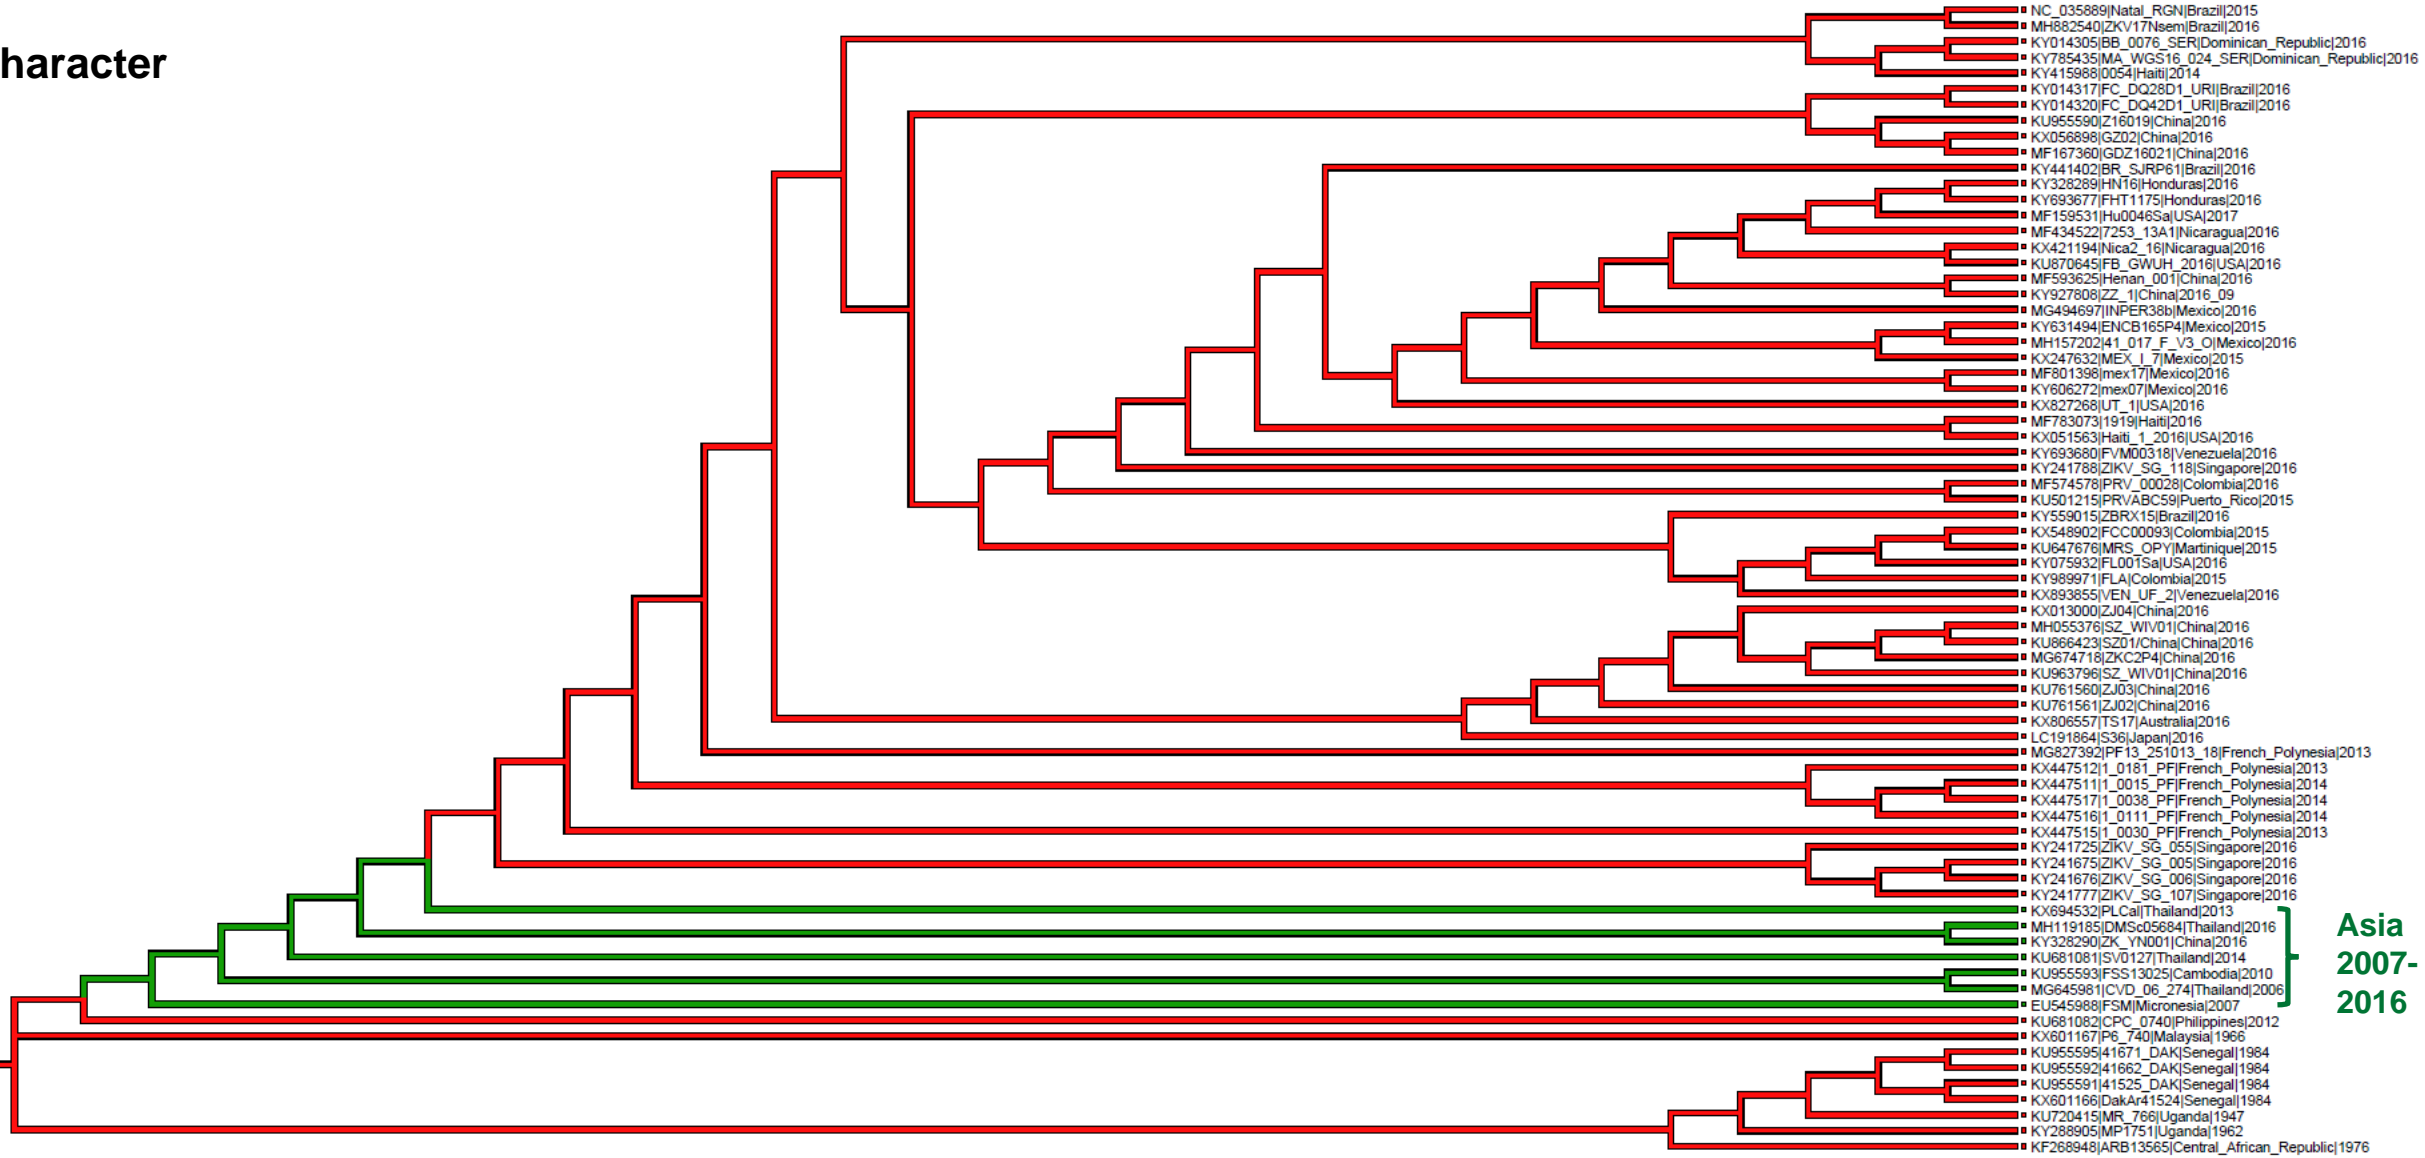

Asian lineage

Asia  
2007-  
2016

African lineage

# Extended Data Figure 2a

# Trace character

PrM\_1

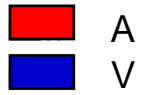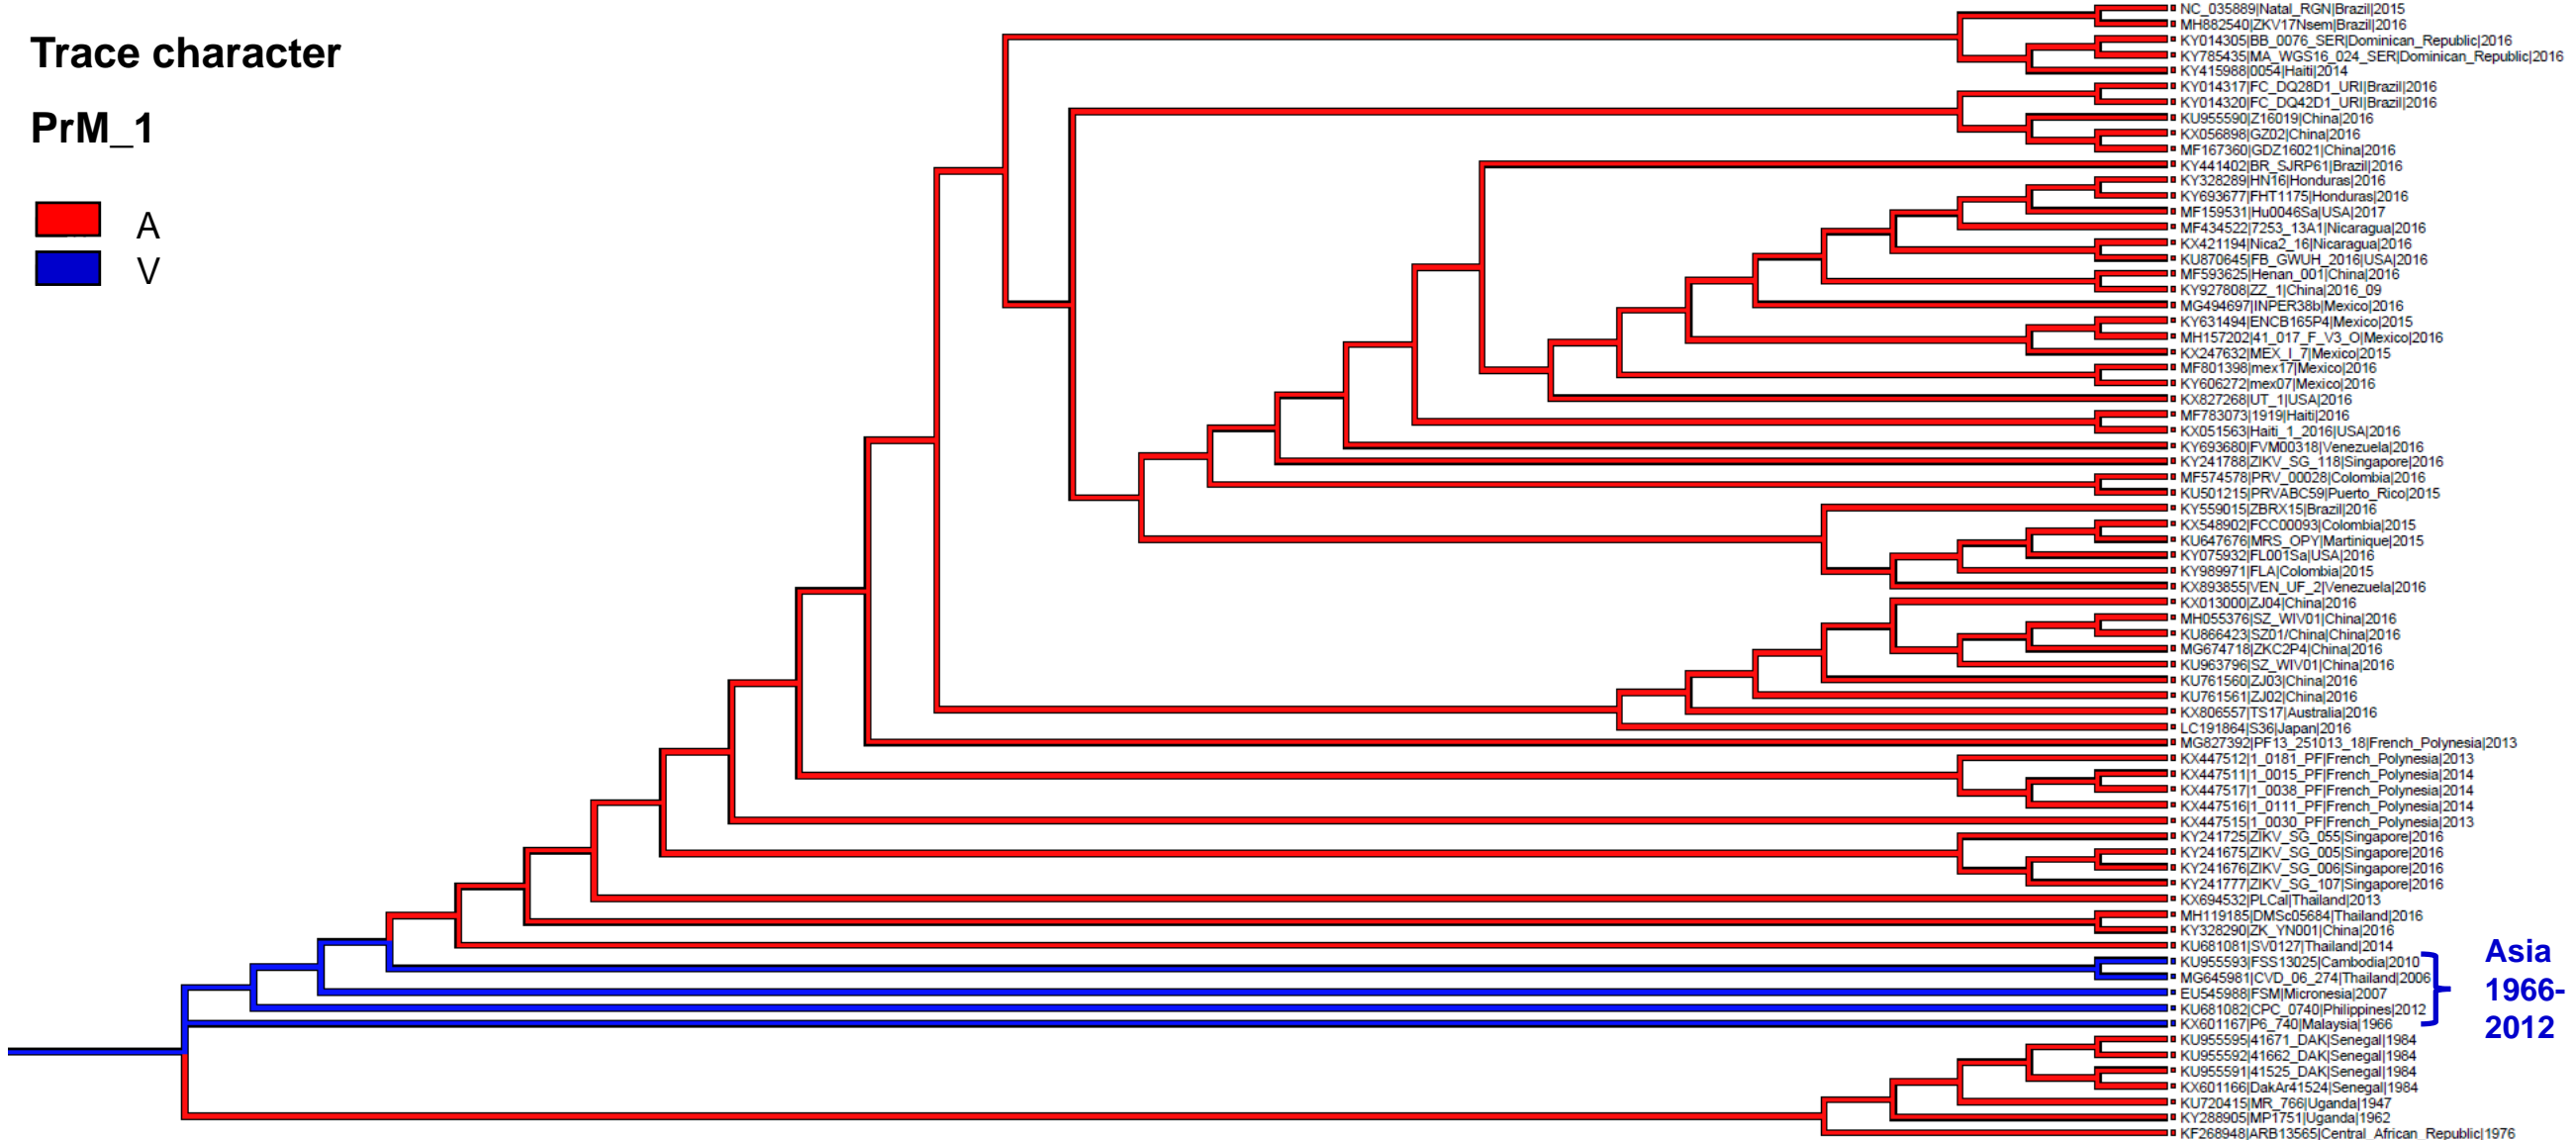

Asian lineage

Asia  
1966-  
2012

African lineage

# Extended Data Figure 2b

Trace character

NS1\_188

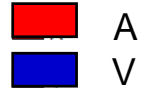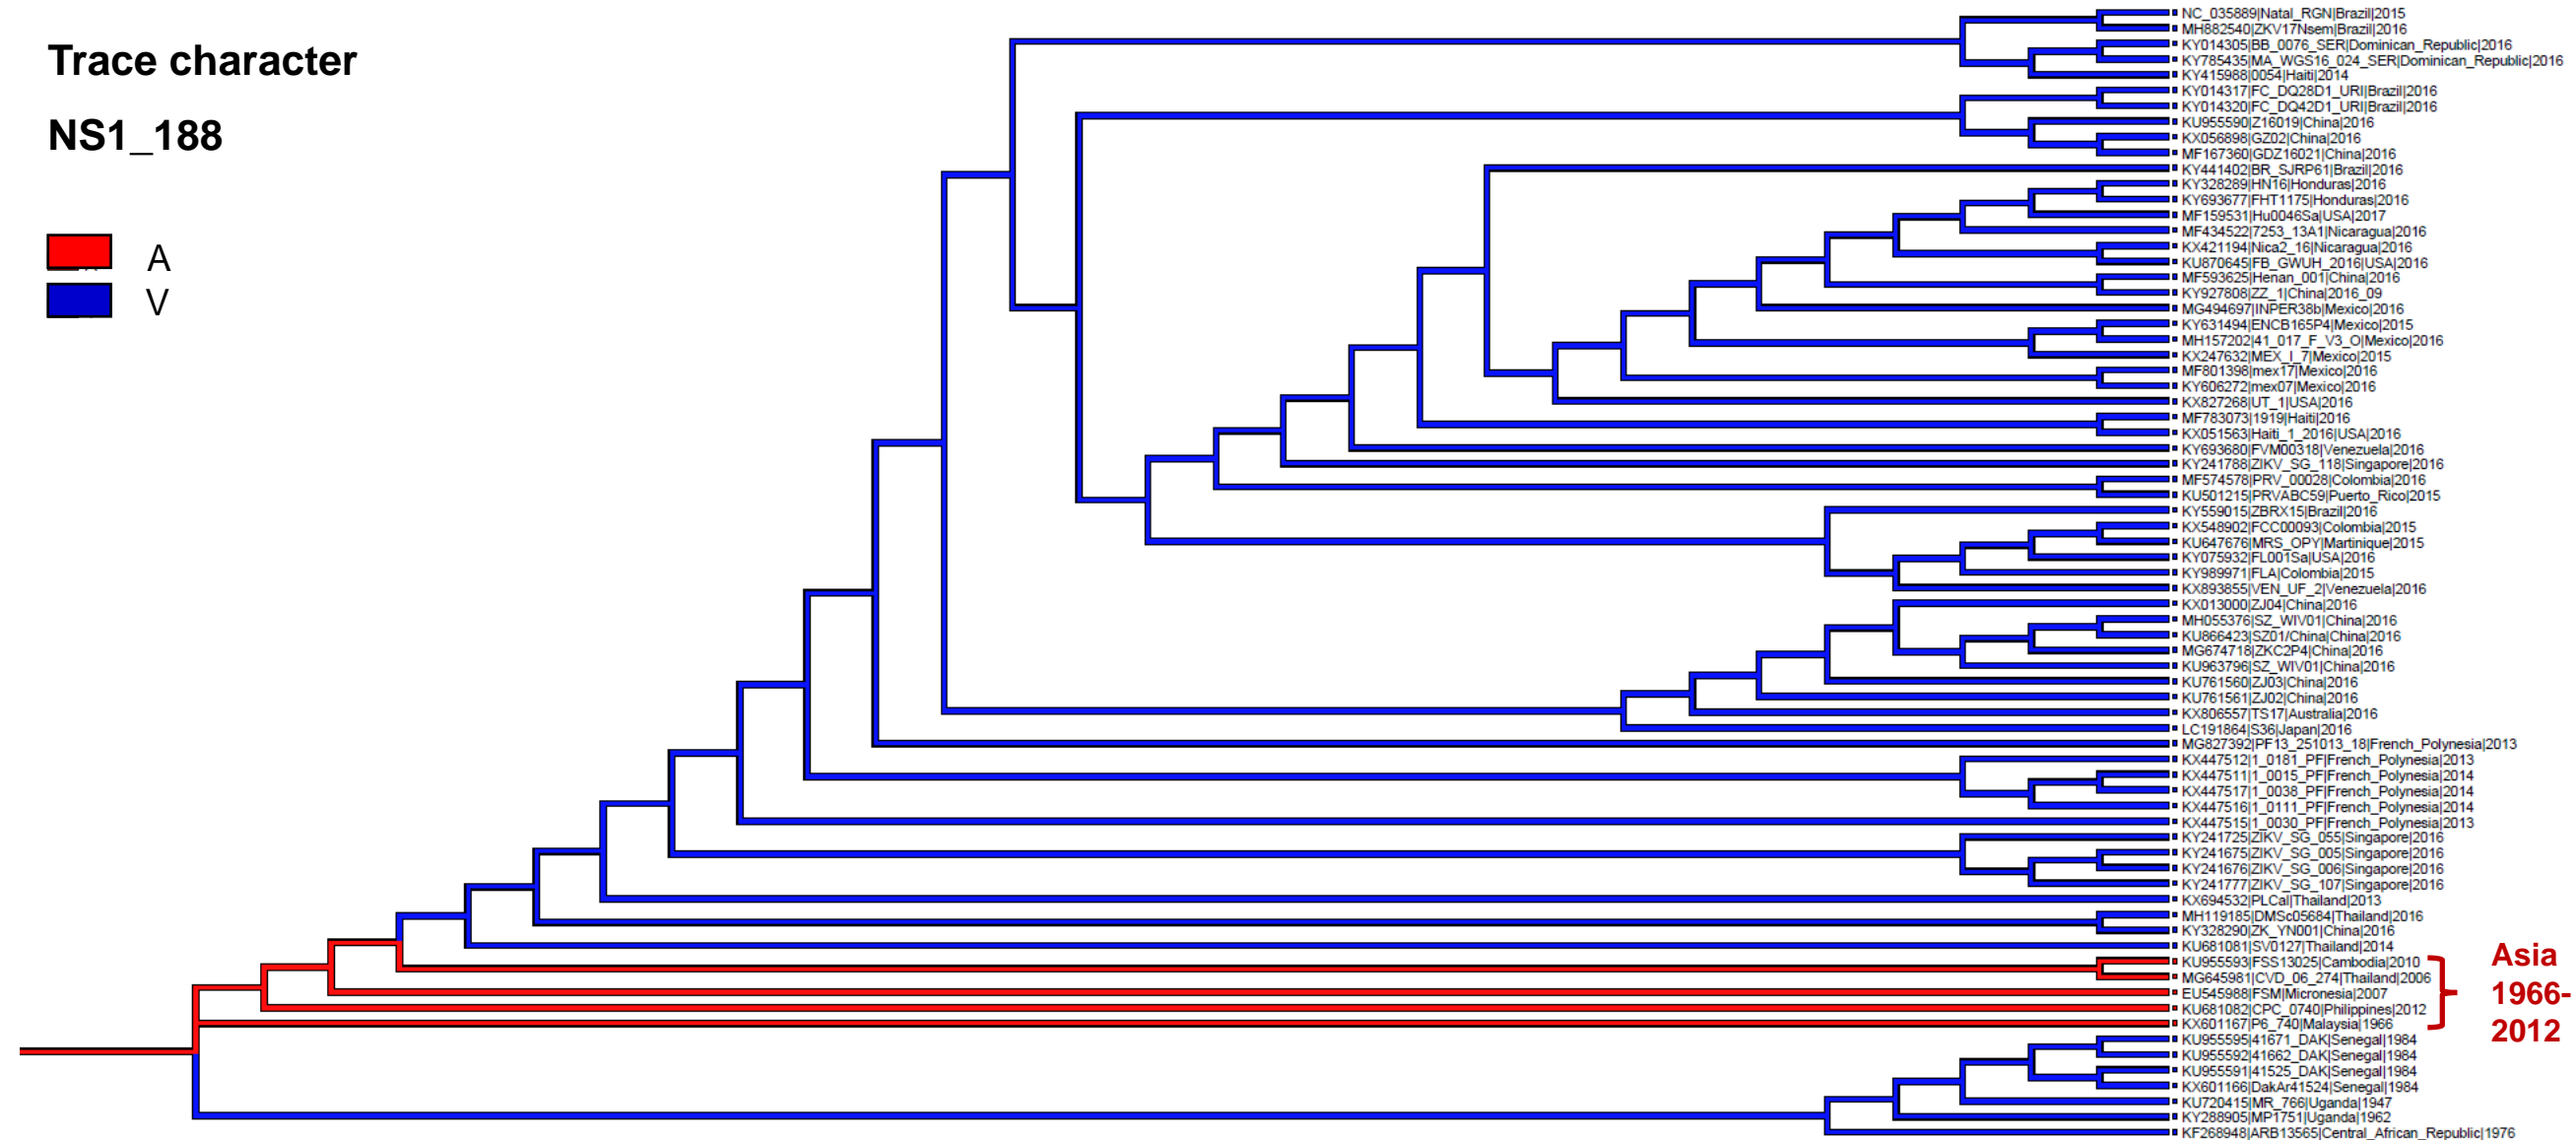

Asian lineage

Asia  
1966-  
2012

African lineage

Extended Data Figure 2c



# Trace character

NS5\_872

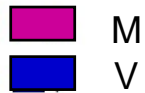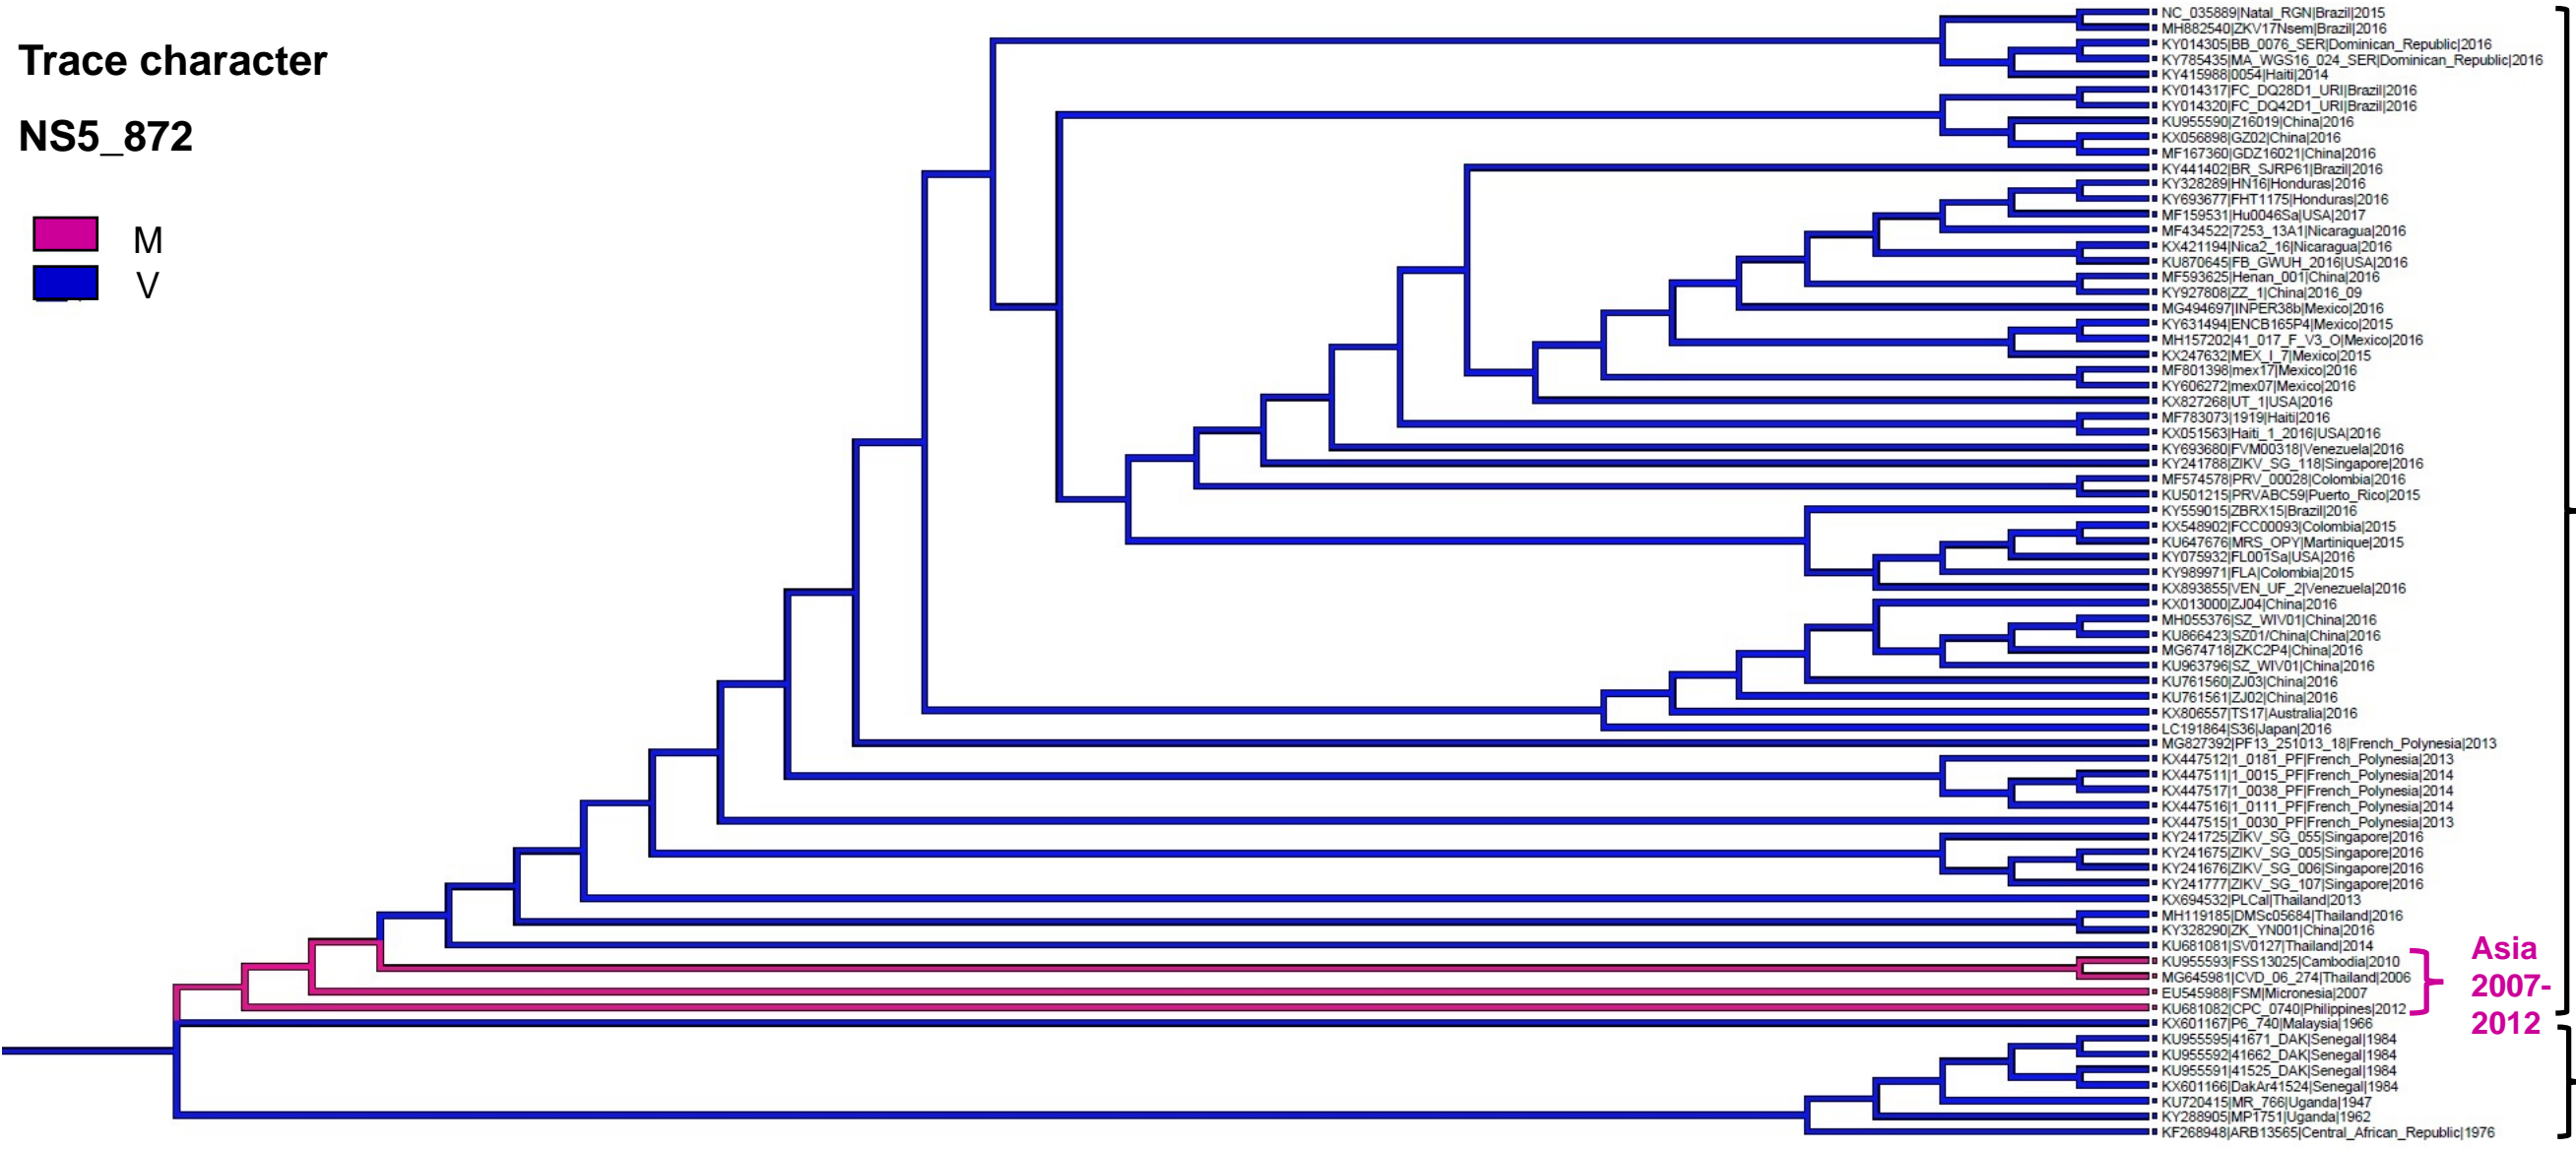

Asian lineage

Asia  
2007-  
2012

African lineage

# Extended Data Figure 2d

**a**

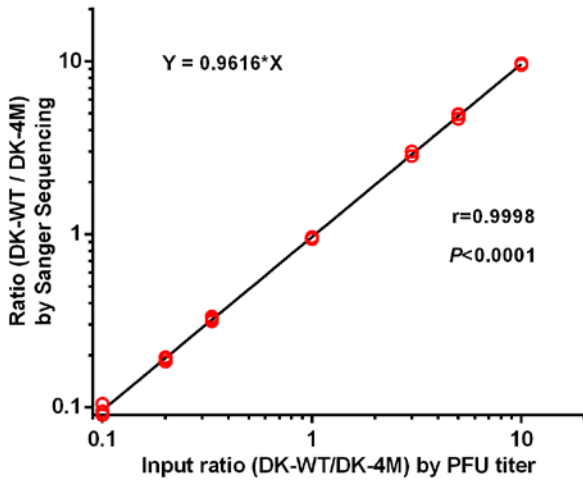

**b**

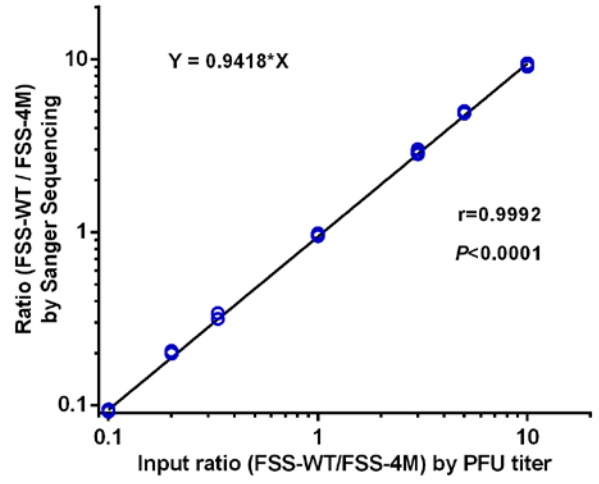

**c**

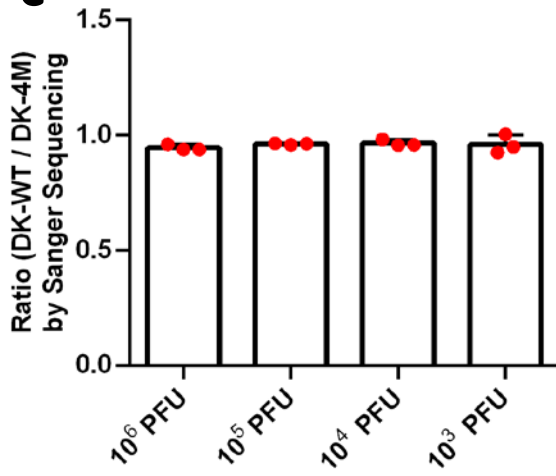

**d**

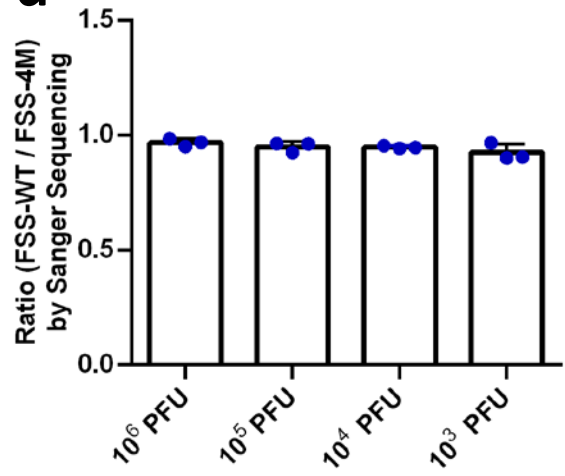

**a**

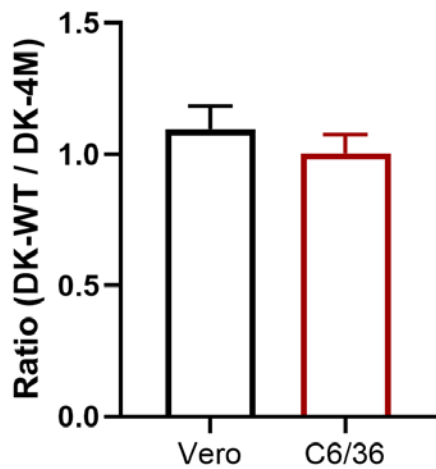

**b**

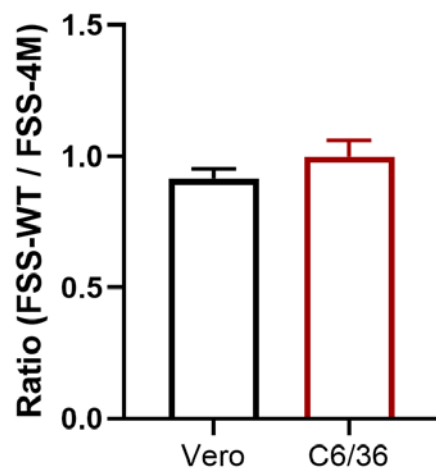

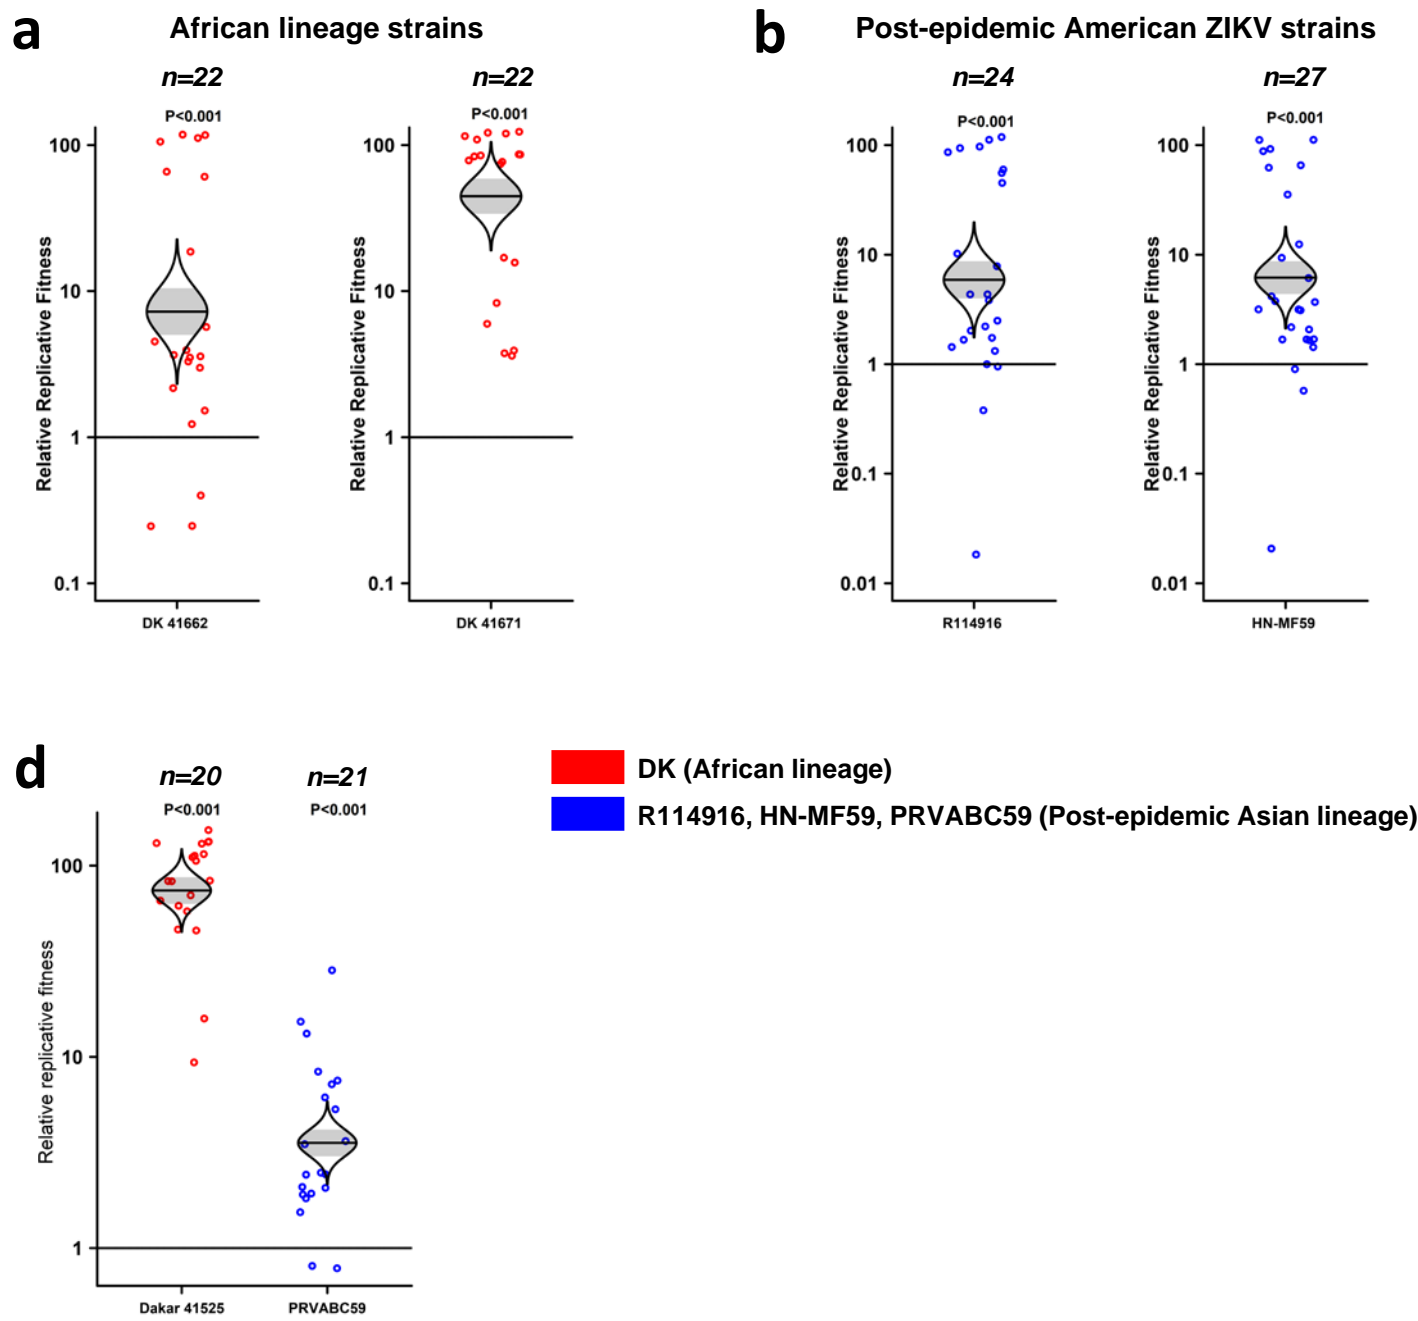

**a**

Dakar 41525 over FSS13025

*n*=6

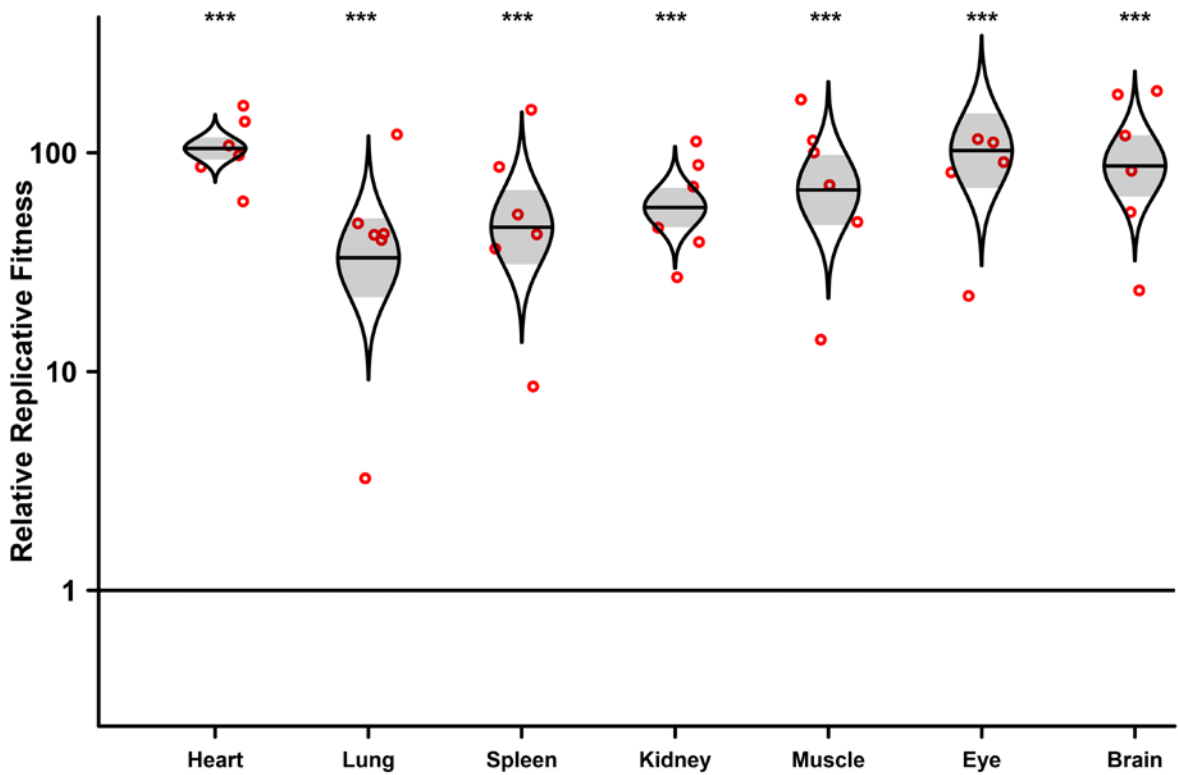

**b**

PRVABC59 over FSS13025

*n*=6

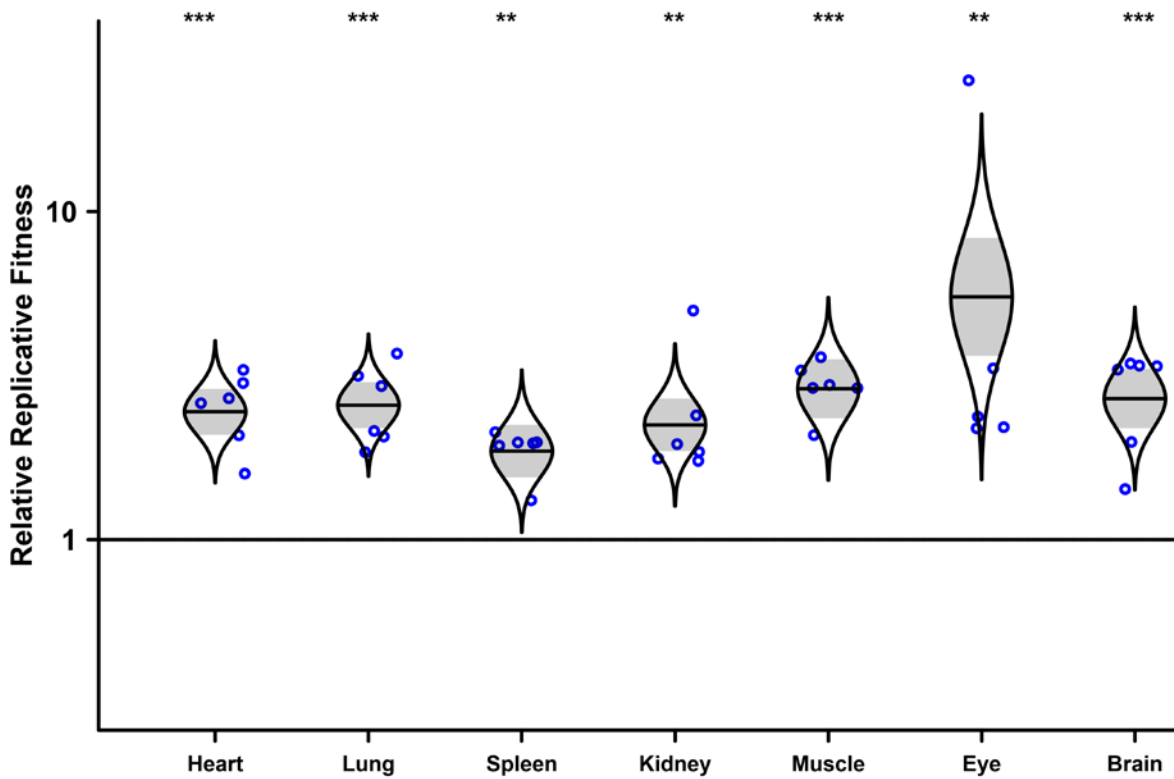

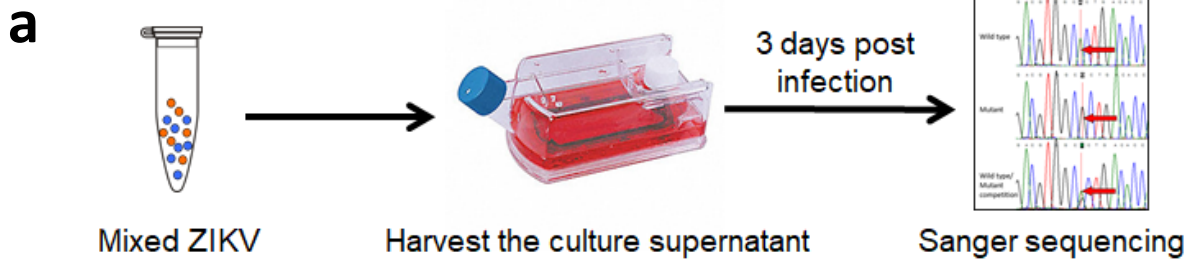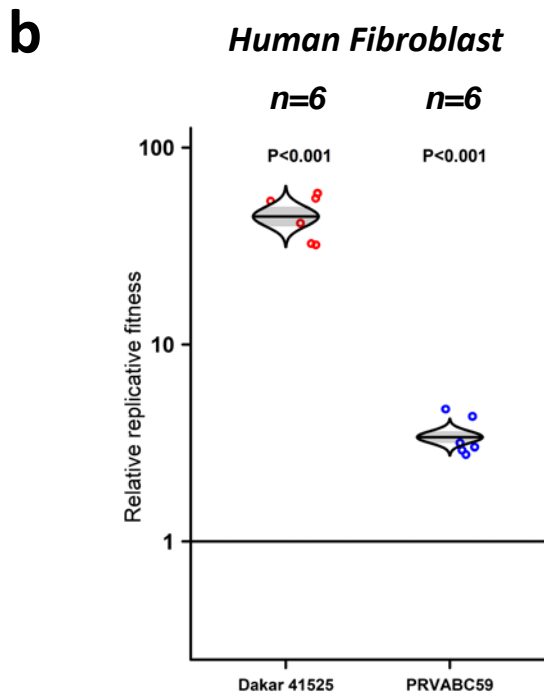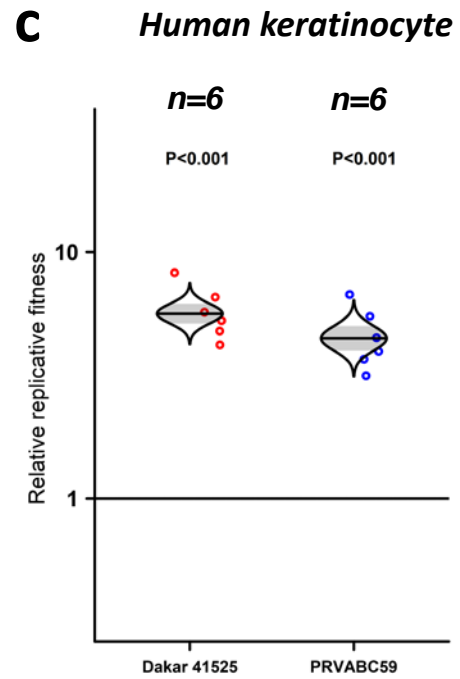

**a**

**DK-4M over DK-WT**

*n*=6

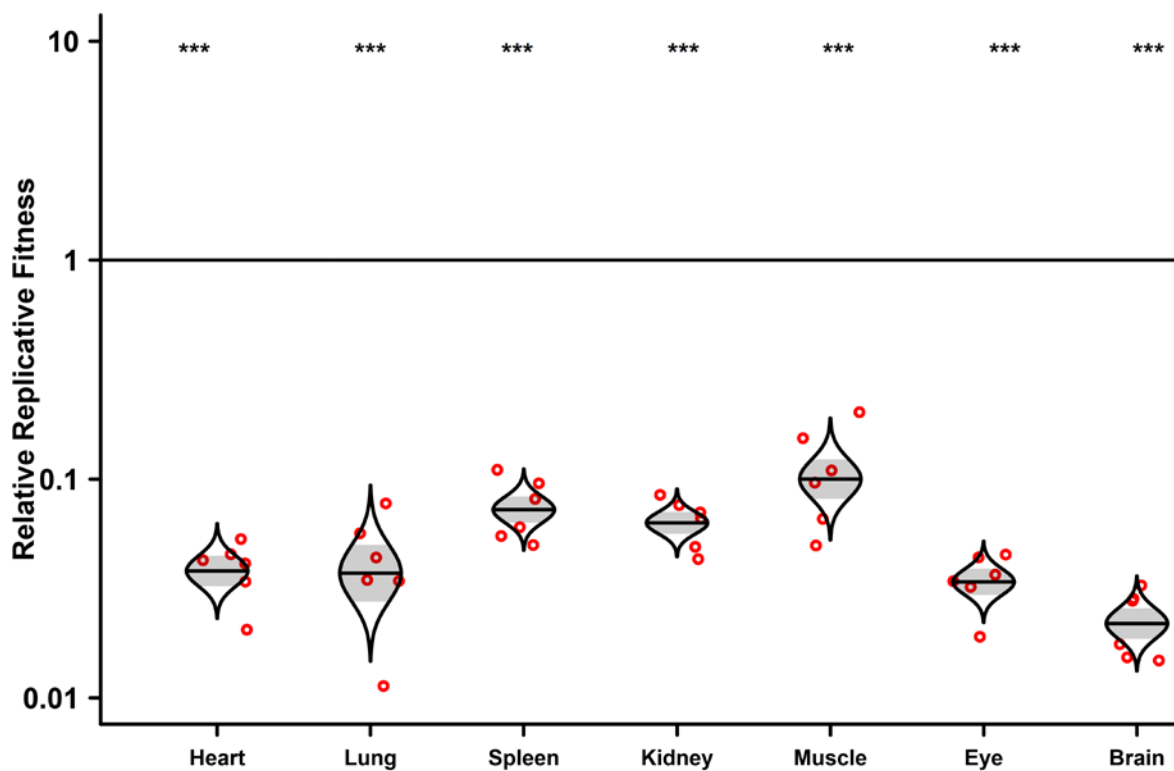

**b**

**FSS-4M over FSS-WT**

*n*=6

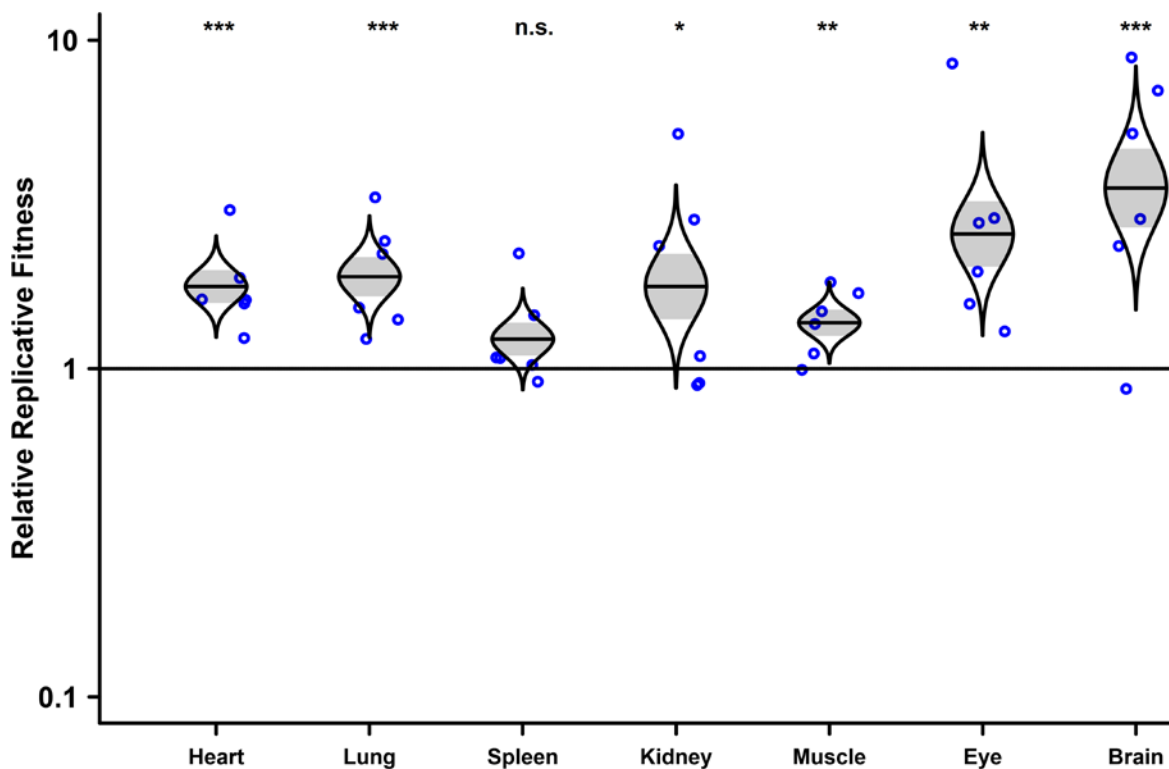

**a**

**Human Fibroblast**

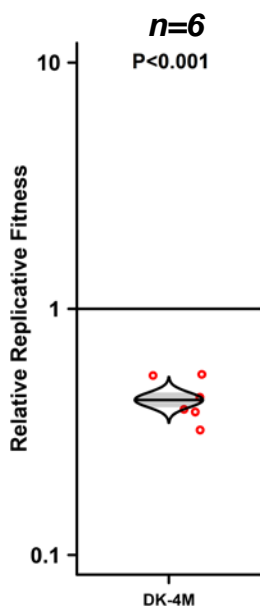

**b**

**Human keratinocyte**

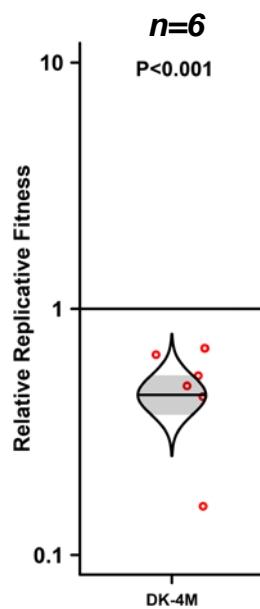

**c**

**Human Fibroblast**

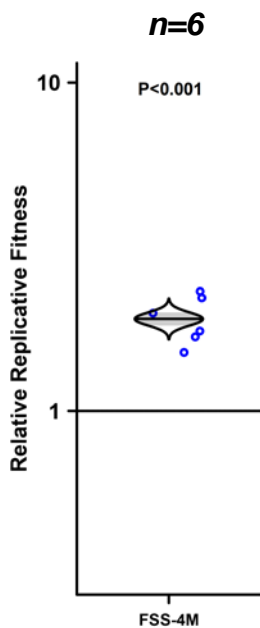

**d**

**Human keratinocyte**

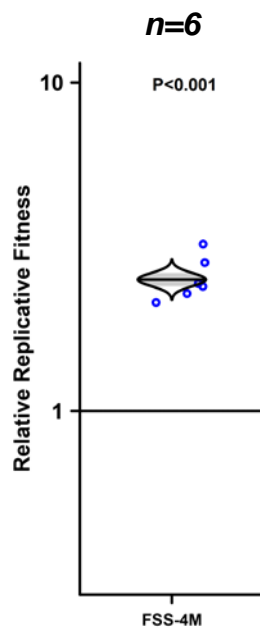



**a**

**DK-V188A over DK-WT**

*n*=6

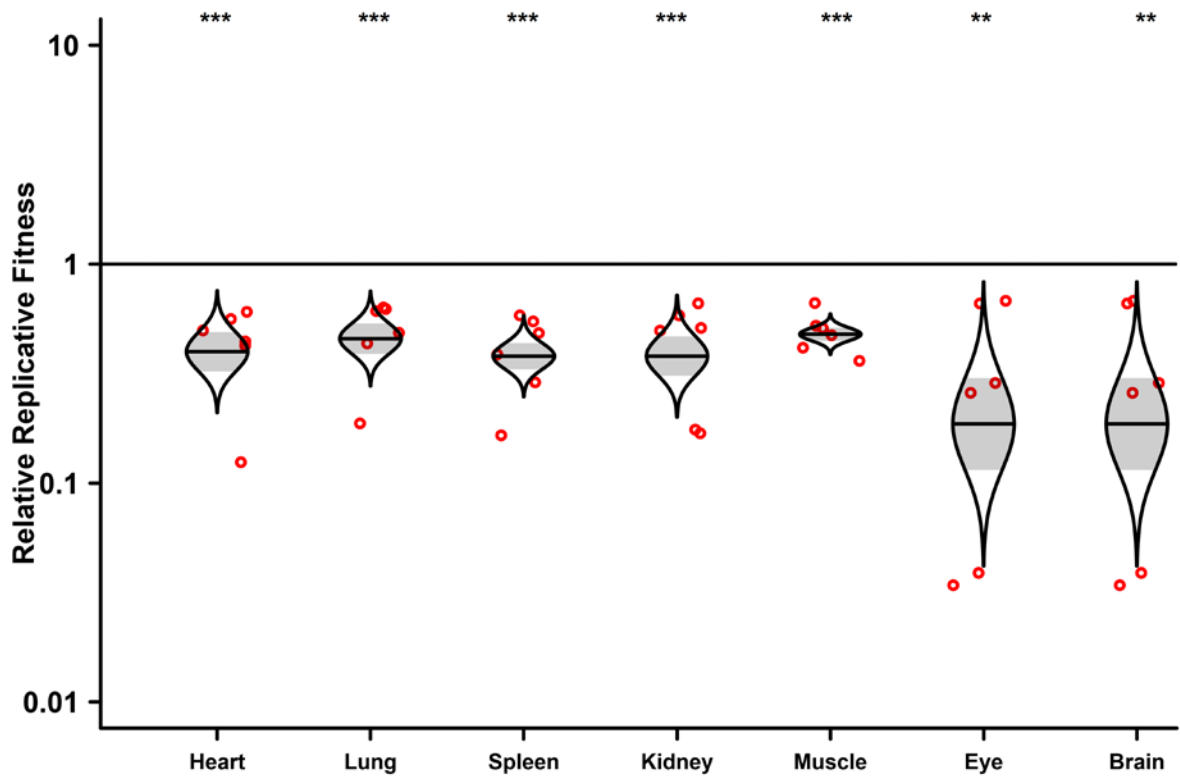

**b**

**FSS-A188V over FSS-WT**

*n*=6

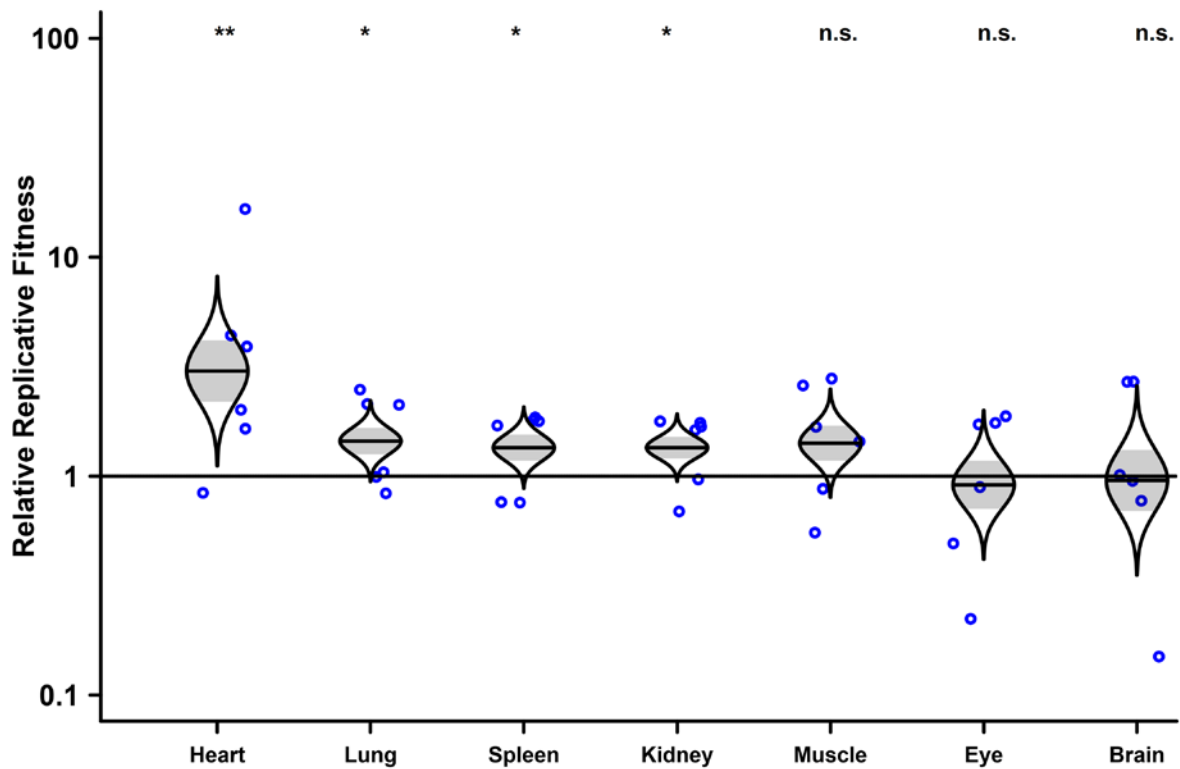

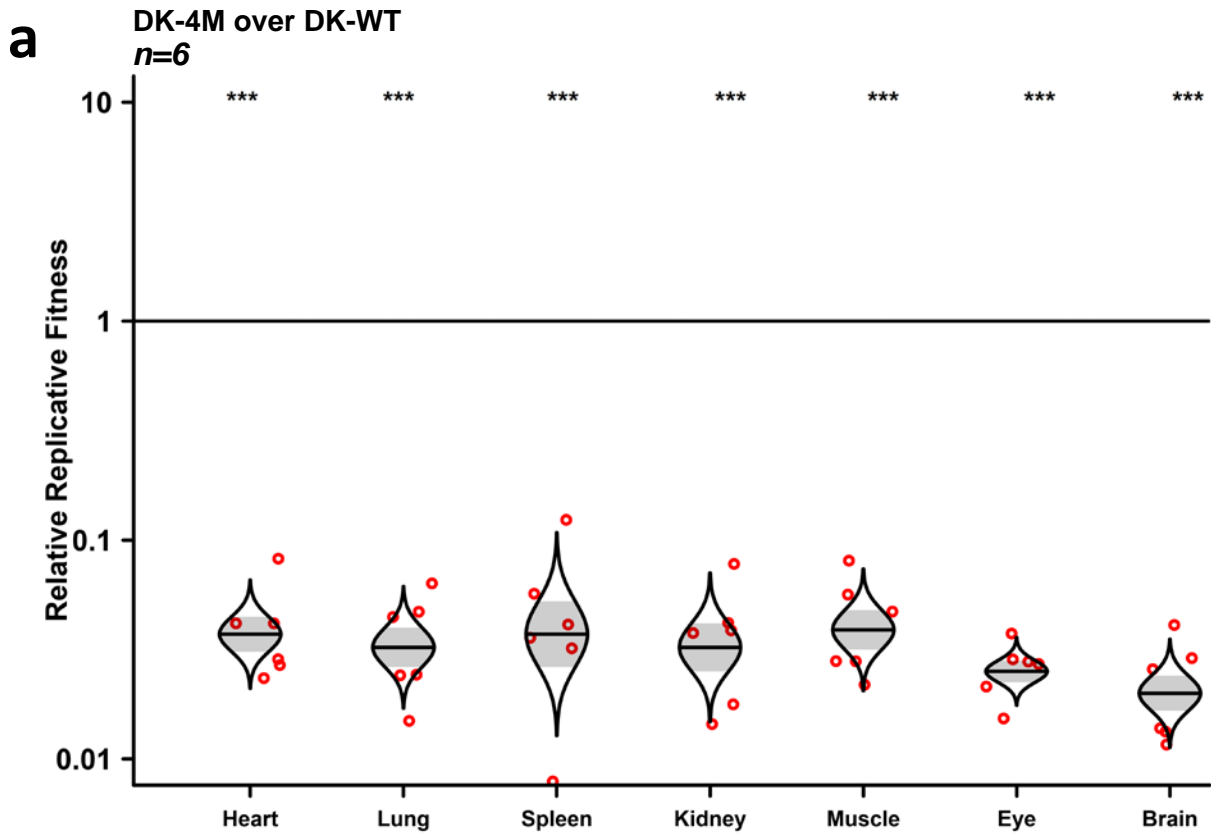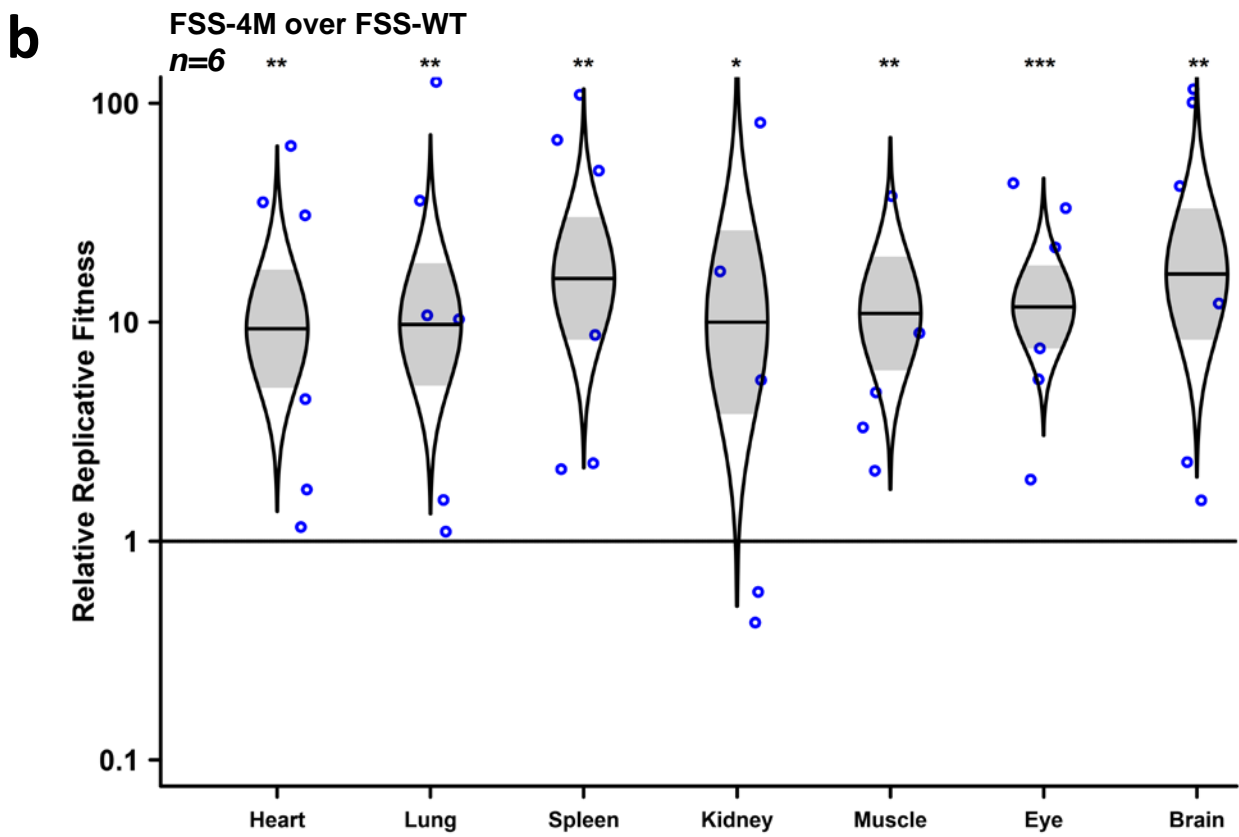

**Extended Data Figure 11**

**Extended Data Table 1. Summary of conserved amino acid substitutions between pre-epidemic and post-epidemic Asian lineage ZIKVs.**

| Pre-epidemic amino acid residue | Post-epidemic amino acid residue | Amino acid position in polyprotein | Phenotypes                                                                | Reference        |
|---------------------------------|----------------------------------|------------------------------------|---------------------------------------------------------------------------|------------------|
| T                               | A                                | C-106 <sup>th</sup>                | Enhances neurovirulence in newborn CD-1 pups                              | Shan et al, 2020 |
| V                               | A                                | prM-1 <sup>st</sup>                | No difference of neurovirulence in newborn CD-1 pups                      | Shan et al, 2020 |
| N                               | S                                | prM-8 <sup>th</sup>                | No difference of neurovirulence in newborn Balb/c pups                    | Yuan et al, 2017 |
| S                               | N                                | prM-17 <sup>th</sup>               | Enhances neurovirulence in newborn Balb/c pups                            | Yuan et al, 2017 |
| V                               | M                                | E-473 <sup>rd</sup>                | Enhances fitness in nonhuman primate                                      | Shan et al, 2020 |
| A                               | V                                | NS1-188 <sup>th</sup>              | Enhances viral infection in <i>Aedes aegypti</i> mosquito                 | Liu et al, 2017  |
| M                               | V                                | NS5-114 <sup>th</sup>              | Enhances neurovirulence in newborn CD-1 pups, no statistical significance | Shan et al, 2020 |
| M                               | V                                | NS5-872 <sup>nd</sup>              | Enhances neurovirulence in newborn CD-1 pups                              | Shan et al, 2020 |

**Extended Data Table 2. The relative fitness advantage<sup>a</sup> of ZIKV mutant strains in mosquitoes, mice and human primary cells.**

| Virus backbone          | Virus competition    | Mosquito body | Mosquito leg | Mosquito saliva | Mouse serum | Human Keratinocyte | Human Fibroblast |
|-------------------------|----------------------|---------------|--------------|-----------------|-------------|--------------------|------------------|
| Dakar virus backbone    | FSS13025/Dakar 41525 | 0.2***        |              |                 | 0.1***      | 0.2***             | 0.02***          |
|                         | DK-4M/DK-WT          | 0.1***        | 0.2***       | 0.1***          | 0.02***     | 0.4***             | 0.4***           |
|                         | DK-A106T/DK-WT       | 0.3***        | 0.3***       | 0.2***          |             |                    |                  |
|                         | DK-A1V/DK-WT         | 0.8           | 1.0          | 0.7             |             |                    |                  |
|                         | DK-V188A/DK-WT       | 0.4***        | 0.2***       | 0.3***          | 0.5***      |                    |                  |
|                         | DK-V872M/DK-WT       | 0.6           | 0.6          | 0.6             |             |                    |                  |
| FSS13025 virus backbone | PRVABC59/FSS13025    | 2.9**         |              |                 | 2.6***      | 4.4***             | 3.4***           |
|                         | FSS-4M/FSS-WT        | 4.7***        | 4.9***       | 2.3*            | 1.5**       | 2.5***             | 1.9***           |
|                         | FSS-T106A/FSS-WT     | 1.1           |              |                 |             |                    |                  |
|                         | FSS-V1A/FSS-WT       | 1.2           |              |                 |             |                    |                  |
|                         | FSS-A188V/FSS-WT     | 1.9**         | 2.1***       | 1.51***         | 1.3         |                    |                  |
|                         | FSS-M872V/FSS-WT     | 1.0           |              |                 |             |                    |                  |

<sup>a</sup> Defined as final competitor ratio / inoculum ratio, as described previously to compare adaptive chikungunya virus mutations<sup>35</sup>.

\* P<0.05; \*\* P<0.01; \*\*\* P<0.001.

**Extended Data Table 3. Primers and probes for gene cloning and qPCR**

| <b>Primers for cloning ZIKV full-length mutants</b> | <b>Upper primer</b>                            | <b>Lower primer</b>                           |                                         |
|-----------------------------------------------------|------------------------------------------------|-----------------------------------------------|-----------------------------------------|
| <i>FSS-T106A</i>                                    | GAAGAAGAGACGAGGC <sub>g</sub> CAGATACTAGTGTCG  | CGACACTAGTATCTG <sub>c</sub> GCCTCGTCTCTTCTTC |                                         |
| <i>FSS-VIA</i>                                      | CCACAGCCATGGCAG <sub>c</sub> GGAGGTCCTAGACG    | CGTCTAGTGACCTCC <sub>g</sub> CTGCCATGGCTGTGG  |                                         |
| <i>FSS-A188V</i>                                    | GTCATTGGAACAGCCG <sub>i</sub> TAAGGGAAAGGAGGCT | AGCCTCCTTTCCCTT <sub>Aa</sub> CGGCTGTCCAATGAC |                                         |
| <i>FSS-M872V</i>                                    | CACAGTCAACATG <sub>g</sub> TcCGTAGGATCATAGGTG  | CACCTATGATCCTACG <sub>g</sub> AcCATGTTGACTGTG |                                         |
| <i>DK-A106T</i>                                     | GGAAAGAGACGTGG <sub>Ca</sub> CTGACACCAGCATCG   | CGATGCTGGTGCAG <sub>t</sub> GCCACGTCTCTCC     |                                         |
| <i>DK-A1V</i>                                       | CACAGCCATGGCAG <sub>i</sub> CGAGATCACTAGACG    | CGTCTAGTGATCTC <sub>Ga</sub> CTGCCATGGCTGTG   |                                         |
| <i>DK-V188A</i>                                     | CCGTATAGGAACAGCTG <sub>c</sub> CAAGGGAAAGG     | CCTTCCCTTG <sub>g</sub> CAGCTGTCTCTATGACGG    |                                         |
| <i>DK-V872M</i>                                     | AGACACAGTCAACATG <sub>a</sub> TGCGTAGGATCAT    | ATGATCCTACG <sub>Ca</sub> iCATGTTGACTGTGTCT   |                                         |
| <b>Primers for one-step RT-PCR</b>                  | <b>Upper primer</b>                            | <b>Lower primer</b>                           |                                         |
| <i>FSS-T106A</i>                                    | GGCGATTCTAGCCTTTTGG                            | TACCCCTCATCCAGCATA                            |                                         |
| <i>FSS-VIA</i>                                      | GGCGATTCTAGCCTTTTGG                            | TACCCCTCATCCAGCATA                            |                                         |
| <i>FSS-A188V</i>                                    | TGACACACTGAAGGAATGC                            | CACTATGCCATGGCCCTTT                           |                                         |
| <i>FSS-M872V</i>                                    | TGGAACAGAGTGTGGATTG                            | ATGGCGTTCTCGGCCTGACTA                         |                                         |
| <i>DK-A106T</i>                                     | GGCGATACTAGCCTTCTTG                            | CAGGTTCCGTACACAACCCA                          |                                         |
| <i>DK-A1V</i>                                       | GGCGATACTAGCCTTCTTG                            | CAGGTTCCGTACACAACCCA                          |                                         |
| <i>DK-V188A</i>                                     | GCCAGTGCCTGTGAATGA                             | CACTATGCCATGGCCCTTT                           |                                         |
| <i>DK-V872M</i>                                     | AGAGTGTGGATTGAGGAGAA                           | ACTCAGTGTCTCTGAGGGG                           |                                         |
| <b>Primers for sanger sequencing</b>                | <b>Upper primer</b>                            |                                               |                                         |
| <i>FSS-T106A</i>                                    | GGCGATTCTAGCCTTTTGG                            |                                               |                                         |
| <i>FSS-VIA</i>                                      | GGCGATTCTAGCCTTTTGG                            |                                               |                                         |
| <i>FSS-A188V</i>                                    | TGACACACTGAAGGAATGC                            |                                               |                                         |
| <i>FSS-M872V</i>                                    | TGGAACAGAGTGTGGATTG                            |                                               |                                         |
| <i>DK-A106T</i>                                     | GGCGATACTAGCCTTCTTG                            |                                               |                                         |
| <i>DK-A1V</i>                                       | GGCGATACTAGCCTTCTTG                            |                                               |                                         |
| <i>DK-V188A</i>                                     | GCCAGTGCCTGTGAATGA                             |                                               |                                         |
| <i>DK-V872M</i>                                     | AGAGTGTGGATTGAGGAGAA                           |                                               |                                         |
| <b>The primers for Taqman RT-qPCR</b>               | <b>Upper primer</b>                            | <b>Lower primer</b>                           | <b>Probe (for Taqman QPCR)</b>          |
| <i>ZIKV envelope gene</i>                           | AGGACGGGAGRTCCATTGTGG                          | AGRCAAGCAGTCTCCCGGATG                         | FAM-TGCCGCCACCAAGATGAACTGATTGGCCG-TAMRA |
